# Supplementary material
Source: Research Square preprint supplement (doi:10.21203/rs.3.rs-9060910/v1)
Supplement: Supplementary file 2 [file 69d1d90e5297acfa69216c38.docx]

**Methods**

**Plasmid DNA constructs**

pMSCVgfp-AID plasmid (Addgene plasmid #15925)1 was used to generate pMSCVgfp-APOBEC3 plasmids by replacing AID with APOBEC3. To create pMSCVgfp vehicle plasmid, the pMSCVgfp-AID plasmid was digested with XhoI and EcoRI restriction enzymes to remove AID, repaired by DNA polymerase I, Large (Klenow) fragment (catalog number: M0210S, New England Biolabs), and self-ligated. pCA-A3A-3xHA plasmid was obtained from Dr. Kenzo Tokunaga (National Institute of Infectious Diseases, Japan)2. To create pMSCVgfp-A3A or pMSCVgfp-A3A-3xHA plasmid, the A3A coding region (NM_145699) was amplified from the pCA-A3A-3xHA using forward primer 5’-AGATCTCTCGAGATGGAAGCCAGCCCAGCATC-3’ and reverse primer 5’-GGTAGAATTCTCAGTTTCCCTGATTCTGGAG-3’ or 5’-GTAGAATTCCTAAGCGTAATCTGGAACGTCATATGGATAGGATCCTGCATAGTCCGGGACGTCATAGGGATAGCCCGCATAGTCAGGAACATCGTATGGGTAGTTTCCCTGATTCTGGAGAATG-3’, respectively. The PCR products were digested with XhoI and EcoRI restriction enzymes and ligated into a similarly digested pMSCVgfp vector. pCA-A3B-3xHA plasmid was obtained from Dr. Kenzo Tokunaga2. To create pMSCVgfp-A3B or pMSCVgfp-A3B-3xHA plasmid, the A3B coding region (NM_004900) was amplified from the pCA-A3B-3xHA using forward primer 5’-AGATCTCTCGAGATGAATCCACAGATCAGAAATC-3’ and reverse primer 5’-GGTAGAATTCTCAGTTTCCCTGATTCTGGAG-3’ or 5’-GTAGAATTCCTAAGCGTAATCTGGAACGTCATATGGATAGGATCCTGCATAGTCCGGGACGTCATAGGGATAGCCCGCATAGTCAGGAACATCGTATGGGTAGTTTCCCTGATTCTGGAGAATG-3’, respectively. The PCR products were digested with EcoRI restriction enzyme, repaired by DNA polymerase I, Large (Klenow) fragment, digested with XhoI restriction enzyme, and ligated into similarly generated pMSCVgfp vector. pcDNA3.1-A3C-V5-6xHis plasmid was obtained from NIH AIDS Reagent Program (catalog number: 10101)3. To create pMSCVgfp-A3C or pMSCVgfp-A3C-3xHA plasmid, the A3C coding region (NM_014508) was amplified from the pcDNA3.1-A3C-V5-6xHis using forward primer 5’-AGATCTCTCGAGATGAATCCACAGATCAGAA-3’ and reverse primer 5’-GGTAGAATTCTCACTGGAGACTCTCCCGT-3’ or 5’-GTAGAATTCCTAAGCGTAATCTGGAACGTCATATGGATAGGATCCTGCATAGTCCGGGACGTCATAGGGATAGCCCGCATAGTCAGGAACATCGTATGGGTACTGGAGACTCTCCCGTAGCC-3’, respectively. The PCR products were digested with XhoI and EcoRI restriction enzymes and ligated into a similarly digested pMSCVgfp vector. pcDNA3.1-A3DE-V5-6xHis plasmid was obtained from NIH AIDS Reagent Program (catalog number: 11433)4. To create pMSCVgfp-A3D or pMSCVgfp-A3D-3xHA plasmid, the A3D coding region (NM_152426) was amplified from the pcDNA3.1-A3DE-V5-6xHis using forward primer 5’-AGATCTCTCGAGATGAATCCACAGATCAGAA-3’ and reverse primer 5’-GGTAGAATTCTCACTGGAGAATCTCCCGTAG-3’ or 5’-GTAGAATTCCTAAGCGTAATCTGGAACGTCATATGGATAGGATCCTGCATAGTCCGGGACGTCATAGGGATAGCCCGCATAGTCAGGAACATCGTATGGGTACTGGAGACTCTCCCGTAGCCTT-3’, respectively. The PCR products were digested with XhoI and EcoRI restriction enzymes and ligated into a similarly digested pMSCVgfp vector. pcDNA3.1-A3F-V5-6xHis plasmid was obtained from NIH AIDS Reagent Program (catalog number: 10100)3. To create pMSCVgfp-A3F or pMSCVgfp-A3F-3xHA plasmid, the A3F coding region (NM_145298) was amplified from the pcDNA3.1-A3F-V5-6xHis using forward primer 5’-ATGAAGCCTCACTTCAGAAACACAG-3’ and reverse primer 5’-TCACTCGAGAATCTCCTGCAGCTTG-3’ or 5’-CTAAGCGTAATCTGGAACGTCATATGGATAGGATCCTGCATAGTCCGGGACGTCATAGGGATAGCCCGCATAGTCAGGAACATCGTATGGGTACTCGAGAATCTCCTGCAGCTTG-3’, respectively. The blunt-end PCR products were ligated with the pMSCVgfp vector digested with XhoI and EcoRI and repaired by DNA polymerase I, Large (Klenow) fragment. pCA-A3G-3xHA plasmid was obtained from Dr. Kenzo Tokunaga2. To create pMSCVgfp-A3G or pMSCVgfp-A3G-3xHA plasmid, the A3G coding region (NM_021822) was amplified from the pCA-A3G-3xHA using forward primer 5’-AGATCTCTCGAGATGAGATTCTTCCACTGGTTCAGC-3’ and reverse primer 5’-GGTAGAATTCTCAGTTTCCTGATTCTGG-3’ or 5’-GTAGAATTCCTAAGCGTAATCTGGAACGTCATATGGATAGGATCCTGCATAGTCCGGGACGTCATAGGGATAGCCCGCATAGTCAGGAACATCGTATGGGTAGTTTTCCTGATTCTGGAGAATG-3’, respectively. The PCR products were digested with XhoI and EcoRI restriction enzymes and ligated into a similarly digested pMSCVgfp vector. pTR600-Flag-A3H (HapII) plasmid was obtained from Dr. Carsten Munk (Einrich-Heine University, Germany). To create pMSCVgfp-A3H or pMSCVgfp-A3H-3xHA plasmid, the A3H coding region (NM_001166002) was amplified from the pTR600-Flag-A3H (HapII) using forward primer 5’-AGATCTCTCGAGATGGCTCTGTTAACAGCCGAAAC-3’ and reverse primer 5’-GGTAGAATTCTCAAGGACTGCTTTATCCTCTC-3’ or 5’-GTAGAATTCCTAAGCGTAATCTGGAACGTCATATGGATAGGATCCTGCATAGTCCGGGACGTCATAGGGATAGCCCGCATAGTCAGGAACATCGTATGGGTAGGACTGCTTTATCCTCTCAAGC-3’, respectively. The PCR products were digested with XhoI and EcoRI restriction enzymes and ligated into a similarly digested pMSCVgfp vector. To create pMSCVgfp-AID-3xHA, pMSCVgfp-AID-Flag, or pMSCVgfp-AID-V5-6xHis plasmid, the AID coding region (NM_020661) was amplified from the pMSCVgfp-AID using forward primer 5’-AGATCTCTCGAGATGGACAGCCTCTTGATGAAC-3’ and reverse primer 5’-GGTAGAATTCCTAAGCAGCGTAATCTGGAACGTCATATGGATAGGATCCTGCATAGTCCGGGACGTCATAGGGATAGCCCGCATAGTCAGGAACATCGTATGGGTAAAGTCCCAAAGTACGAAATGCGTC-3’, 5’- CGGTAGAATTCCTACTTATCGTCGTCATCCTTGTAATCAAGTCCCAAAGTACGAAATGC-3’, or 5’- GGTAGAATTCTCAATGGTGATGGTGATGATGACCGGTACGCGTAGAATCGAGACCGAGGAGAGGGTTAGGGATAGGCTTACCAAGTCCCAAAGTACGAAATGCGTC-3’, respectively. The PCR products were digested with XhoI and EcoRI restriction enzymes and ligated into a similarly digested pMSCVgfp vector. The DNA sequences for the coding regions were confirmed by Sanger Sequencing with primers 5’-TGAACCTCCTCGTTCGACCC-3’ and 5’-TGTAGCGCCAAGTGCCCAGC-3’.

**Mice and tumor xenograft models**

Animal experiments were performed under the mouse protocol approved by Institutional Animal Care and Use Committee (IACUC) of Boston Children’s Hospital (protocol #00001530). All mice were housed and maintained in individually ventilated cages with a 12-h light-dark cycle and with ad libitum access to food and water in the specific pathogen free (SPF) facility at Boston Children’s Hospital. Mice were housed in temperatures of 18-24°C with 40-60% humidity. *c-myc*25x I-SceI and *c-myc*25x I-SceI *Aicda*-deficient transgenic mice in the 129S2 background were used to generate fibroblasts and to isolate naive splenic B cells. Eight–week-old male and female mice that carry heterozygous 25x I-SceI cassette in the *c-myc* locus were used. A minimum of three mice for each experiment was used. Immunodeficient NOD *SCID* gamma (NSG) (NOD.Cg-*prkdc*scid *IL2rg*tm1Wjl*/*SzJ, Stock number: 005557; The Jackson Laboratory) were used for xenograft experiments. We used both male and female mice at the ages of 6-12 weeks. BEAS-2B cells (5 x 106 cells/mouse) transduced with vehicle or A3C, followed by introducing DNA DSBs in *ALK* intron 19 by the CRISPR-Cas9 system, were subcutaneously injected in a flank of NSG mice. Tumor growth was measure with a caliper every seven days. No mice were excluded from the analysis and no randomization or blinding method was used.

**Generation of murine tail fibroblasts**

Murine tail fibroblasts were generated from tails of the *c-myc*25x I-SceI and *c-myc*25x I-SceI *Aicda*-deficient transgenic mice carrying heterozygous 25x I-SceI cassette in the *c-myc* locus. The tail of the mouse was sprayed with 70% ethanol, minced, and incubated overnight in tail fibroblast media containing 1.6 mg/ml collagenase type II (catalog number: 17101015; ThermoFisher Scientific). The following day, digested tissue was disrupted by passage through pipettes and single-cell suspension was obtained using Falcon 70 μm cell strainer (catalog number: 352350; Corning). Isolated cells were centrifuged for 5 min at 1,200 rpm and resuspended in tail fibroblast media. After several passages, immortalized fibroblasts were generated by infection of the fibroblasts with retrovirus carrying SV40 large T (LT) antigen (pBABE-puro SV40 LT; plasmid #13970; Addgene). Cells were infected with viral supernatants in the presence of 6 μg/ml polybrene. After infection, successfully transduced polyclonal cell populations were obtained by puromycin selection.

**Isolation and *ex vivo* culture of murine B cells**

Untouched B cells were isolated from total spleen cell suspensions using anti–CD43 magnetic microbeads (catalog number: 11422D; ThermoFisher Scientific) by depleting T cells, NK cells, plasma cells, CD5+ B1 cells, monocytes/macrophages, platelets, dendritic cells, granulocytes, and erythrocytes. The negatively isolated untouched B cells were collected and measured the purity with B220 expression. The purity of isolated untouched B cells was typically around 96% to 98% in all experiments. Untouched B cells were cultured at a concentration of 5 x 105 cells/ml in RPMI medium supplemented with 15% fetal bovine serum (FBS, catalog number: 10437028; ThermoFisher Scientific), 100 units/ml penicillin-streptomycin (catalog number: MT30002Cl; Fisher Scientific), 2 mM L-glutamine (catalog number: MT25005Cl; Fisher Scientific), 1 μg/ml anti–CD40 antibody (clone HM40-3, catalog number: 16-0402-82; ThermoFisher Scientific), and 20 ng/ml recombinant murine IL-4 (catalog number: 214-14; PeproTech) for 4 days.

**Cell cultures, transfection, transductions, and puromycin selection**

Immortalized fibroblasts were maintained in DMED supplemented with 10% FBS, 100 units/ml penicillin-streptomycin, and 2 mM L-Glutamine. Cell were cultured at 37°C in 5% CO2 atmosphere. Cells were transduced with APOBEC-containing retroviral supernatants in presence of 6 μg/ml polybrene. The viral supernatant was exchanged for fresh medium 6 h later. After 2 days, cells were transduced with I-SceI-containing retroviral supernatants with 6 μg/ml polybrene. The viral supernatant was exchanged for fresh medium 6 h later. After 2 days, cells were treated with 6 μg/ml puromycin for 3 days to select resistant cells.

PC-9 cells were a kind gift from Dr. Pasi A. Jänne (Dana-Farber Cancer Institute, Boston, MA, catalog number: 90071810; Millipore Sigma) and were maintained in RPMI medium supplemented with 10% FBS, 100 units/ml penicillin-streptomycin, and 2 mM L-Glutamine. Cell were cultured at 37°C in 5% CO2 atmosphere. PC-9 cells were transduced with APOBEC-containing retroviral supernatants in presence of 6 μg/ml polybrene. The viral supernatant was exchanged for fresh medium 6 h later. After 2 days, cells were transduced with CRISPR/Cas9-containing lentiviral supernatants with 6 μg/ml polybrene. The viral supernatant was replaced with fresh culture medium 6 h later. After 2 days, cells were treated with 1 μg/ml of puromycin for 3 days to select resistant cells.

Phoenix-ECO (catalog number: CRL-3214; ATCC), and GP2-293 packaging (catalog number: 631458; TaKaRa Bio) cells were maintained in DMED supplemented with 10% FBS, 100 units/ml penicillin-streptomycin, and 2 mM L-Glutamine. Cells were cultured at 37°C in 5% CO2 atmosphere. Cells were transfected with APOBEC plasmids using Xfect transfection reagent (catalog number: 631318; Takara Bio) for cytidine deaminase assay. The medium was replaced with fresh complete growth medium 6 h later. Cells were collected after 48 h post-transfection. Phoenix-ECO, and GP2-293 packaging cells were used to produce retrovirus.

All cell lines were tested negative for *mycoplasma* contamination and were cultured at 37°C in 5% CO2 atmosphere.

**Generation of APOBEC3-knockout PC-9 cell lines**

To generate the entire APOBEC3-knockout PC-9 cell line, PC-9 cells were transduced with two APOBEC3 CRISPR/Cas9 lentiviruses targeting APOBEC3A and APOBEC3H in the presence of 6 μg/ml polybrene. After 48 hours from transduction, cells were selected with 1 μg/ml of puromycin for 3 days. The selected cells were seeded as single colonies in 96-well plates by serial dilutions. After 3-4 weeks of culture, cells derived from each colony were used to assess APOBEC3 knockout by qRT-PCR and genomic sequencing of the deletion for entire APOBEC3 genes.

**Retroviral particle productions**

To produce retroviral particle for murine immortalized fibroblasts and murine B cells, 5.5 x 106 Phoenix-ECO cells were plated in a 10 cm dish. The following day, cells were transfected using Xfect transfection reagent with 20 μg retroviral plasmid and 8 μg of pCL-ECO retrovirus packaging plasmid. The medium was changed 6 h post-transfection. The viral supernatant was collected 48 h post-transfection, passed through a 0.45-μm filter, pooled, and used either fresh or snap frozen.

To produce retroviral particle for human cell lines, 6 x 106 GP2-293 packaging cells were plated in a 10 cm dish. The following day, cells were transfected using Xfect transfection reagent with 20 μg of retroviral plasmid and 8 μg of pCMV-VSV-G retrovirus envelop plasmid (Addgene plasmid #8454). The medium was changed 6 h post-transfection. The viral supernatant was collected 48 h post-transfection, passed through a 0.45-μm filter, pooled, and used either fresh or snap frozen.

**EGFR and ALK inhibitors**

Osimertinib (AZD9291, EGFR inhibitor, catalog number: S7297) was purchased from Selleckchem. We used 100 nM Osimertinib to select resistant PC-9 cells. For cell proliferation assay, osimertinib was used at 0.03 nM to 1,000 nM concentrations as indicated in the corresponding figure legend. For western blot experiments, cells were treated with 100 nM of osimertinib for 4 h.

Alectinib (ALK inhibitor, catalog number: S2762) was purchased from Selleckchem. For cell proliferation assay, lorlatinib was used at 0.03 nM to 1,000 nM concentrations as indicated in the corresponding figure legend. For western blot experiments, cells were treated with100 nM of lorlatinib for 4 h.

**Cell proliferation assay**

PC9 cells (4 x 103 cells/well) were plated into 96-well plates and were treated with either EGFR inhibitor (osimertinib) or ALK inhibitor (alectinib), as well as combination with both EGFR inhibitor and ALK inhibitor for 72 hr. 20 μl of CellTiter 96® Aqueous One Solution Reagent (catalog number: G3582; Promega) was added into each well and cells were incubated for 1 hr. The absorbance was measured at 490nm using a 96-well plate reader. Inhibitory concentration (IC50) values were derived by a sigmoidal dose-response (variable slope) curve using GraphPad Prism software.

**CRISPR/Cas9 sgRNA design and cloning**

For SpCas9 expression and generation of single guide RNA (sgRNA), the 20-nt target sequences were selected to precede a 5’-NGG protospacer-adjacent motif (PAM) sequence. The human *EML4-*intron 6-targeting sgRNA, the human *ALK-*intron 19-targeting sgRNA, the two human *APOBEC3*-targeting sgRNAs, and the human *RET-*intron 11-targeting sgRNA, the human *ROS1-*intron 33-targeting sgRNA, the human *NTRK1*-intron 11-targeting sgRNA, were designed with the CRISPR design tool (CRISPick; <https://portals.broadinstitute.org/gppx/crispick/public>). Oligonucleotides synthesized by Integrated DNA technology (IDT) were annealed and cloned into the *BsmbI-BsmbI* sites downstream from the human U6 promoter in LentiCRISPR v2 plasmid (Addgene plasmid #52961). sgRNA sequences were confirmed by Sanger sequencing with U6 promoter primer 5’-GAGGGCCTATTTCCCATGAT-3’.

**Genomic DNA isolation and PCR**

Genomic DNA (gDNA) was extracted from mouse cells using rapid lysis buffer (100 mM Tris-HCl pH8.0, 200 mM NaCl, 5 mM EDTA, 0.2% SDS) containing 10 μg/ml Proteinase K (catalog number: P2308; Sigma Aldrich). After overnight incubation at 56 °C, gDNA was precipitated in one volume isopropanol, and the DNA pellet was resuspended in Tris-EDTA (TE) buffer. Specific primer sets were used for PCR amplifications to calculate I-SceI cutting efficiency. gDNA was used for PCR and HTGTS library preparation.

**Flow cytometry**

Murine B cells were stained with PE-conjugated anti-IgG1 antibody (Clone A85-1, catalog number: 550083; BD Pharmingen; 1:100 dilution) and APC-conjugated anti-CD45R/B220 (Clone RA3-6B2, catalog number: 553092; BD Biosciences; 1:100 dilution) for 30 min on ice and analyzed using a FACSVerse flow cytometer (BD Biosciences). IgG1-positive cells were gated on GFP. Data were analyzed by FlowJo software (FlowJo v10.10.0).

**Protein extraction and western blot analysis**

Whole-cell extracts were obtained from HEK-293T cells transfected with human APOBEC plasmids or osimertinib-treated PC9 cells using GST buffer (10 mM MgCl2, 150 mM NaCl, 1% NP-40, 2% Glycerol, 1 mM EDTA, 25 mM HEPES (pH7.5)) supplemented with protease inhibitors (catalog number: 11697498001; Sigma Aldrich), 1 mM phenylmethanesulfonylfluoride (PMSF), 10 mM NaF, and 1 mM Na3VO4. Extracts were cleared by centrifugation at 15,000 rpm for 20 min. The supernatants were collected and assayed for protein concentration using the BCA method (catalog number: BCA1-1KT; Sigma Aldrich). 30 μg of proteins were loaded on 4-15% Mini-Protean TGX Precast Protein Gels (catalog number: 4561085; BIO-RAD) or 4-12% Criterion XT Bis-Tris Protein Gel (catalog number: 3450124; BIO-RAD), transferred on nitrocellulose membrane or PVDF membrane (GE Healthcare), and blocked with 5% nonfat dry milk (catalog number: 1706404; BIO-RAD). Primary antibodies for immunoblotting included: HA (clone: C29F4, catalog number: 3724S; Cell Signaling Technology), β-actin (clone: 13E5, catalog number: 5125S; Cell Signaling Technology), EGF receptor (catalog number: 2232S; Cell Signaling Technology, 1:1,000), phospho-EGF receptor (Tyr1068, clone: D7A5; catalog number: 3777S; Cell Signaling Technology, 1:1,000). Membranes were developed with ECL solution (catalog number: RPN2232; GE Healthcare).

**Cytidine deaminase assay using fluorescent-conjugated ssDNA substrates**

Whole-cell lysates were extracted from the HEK-293T cells transfected with APOBEC plasmids using M-PER mammalian protein extract reagent (catalog number: 78501, Thermo Fisher) with 1 x Halt protease and phosphatase inhibitor cocktail (catalog number: 78440; Thermo Fisher). Prior to the performance of the cytidine deaminase assay, whole-cell lysates (20 μg of total protein) were incubated with RNase A (endonuclease-free, final concentration of 1 μg/μl) in a 20 μl reaction volume for 15 min at 37°C to potentially remove inhibitory cellular RNAs. RNase A-treated lysates (5.5 μl) were mixed with 0.5 pM 5’ Alexa-Flour 488-labeled ssDNA substrate of 42 or 54 bases (Integrated DNA Technologies), 10 units of uracil DNA glycosylase (catalog number: M0208S; New England BioLabs), 20 mM Tris-HCl (pH8.0), 50 mM NaCl, 1 mM dithiothreitol (DTT), 1 mM EDTA, and 2.5 ng RNase in a volume of 40 μl. After 2 hours of incubation at 37°C, the reaction was stopped by adding 40 μg proteinase K with following incubation for 20 min at 65°C. Ten microliters of 1N NaOH was added to the reaction and then the reaction was incubated for 15 min at 37°C. After addition of 10 μl of 1 N HCl to the mixture, 10 μl of the reaction was electrophoresed on a 15% Novex TBE-Urea gel (catalog number: EC68885BOX; ThermoFisher Scientific). The Gel Doc gel imaging system (Bio-Rad) was used to scan the gel in Alexa-Flour 488 fluorescence mode. The deamination activity was expressed as percent deamination product over substrate signal. The data represent the average of at least two independent determinations from at least two different transfections.

**RNA extraction, RT-PCR, and quantitative RT-PCR**

Total RNA was isolated from the cells using RNeasy Plus Mini Kit (catalog number: 74136; Qiagen). cDNA was synthesized using iScript cDNA synthesis kit (catalog number: 1708891; Bio-Rad) following the manufacturer’s instructions. All quantitative RT-PCR experiments were performed in triplicates on ICycler iQ Real-Time PCR Detection System (Bio-Rad) with TaqMan probes (Thermo Fisher Scientific). For quantitative RT-PCR, Human APOBEC3B (Hs00358981_m1-VIC-MGB), human APOBEC3C (Hs00819353_m1-VIC-MGB), and human GAPDH (Hs02786624_g1-FAM-MGB) TaqMan probes (Thermo Fisher Scientific) were used. EML4-ALK fusion transcripts were confirmed with specific primer sets by RT-PCR. Expression levels for individual transcripts were normalized with either *GAPDH* or *ACTB*.

**Generation of HTGTS libraries**

HTGTS libraries were generated by emulsion-mediated PCR (EM-PCR) methods as previously described5. Briefly, gDNA was digested HaeIII enzyme (catalog number: R0108; New England Biolabs) overnight. HaeIII-digested blunt ends were A-tailed with Klenow fragment (3’->5’ exo-, catalog number: M0212; New England Biolabs). An asymmetric adaptor (composed of an upper liner and a lower 3’-modified linker) was then ligated to fragmented DNA. To remove the unrearranged I-SceI cassettes or the unrearranged endogenous *c-myc* locus, ligation reactions were digested with EcoRV (catalog number: R0195L; New England BioLabs) and XbaI (catalog number: R0145L; New England BioLabs). In the first round of PCR, DNA was amplified using a biotinylated forward primer and an adaptor-specific reverse primer with Phusion High-Fidelity DNA polymerase (catalog number: F530S; Thermo Fisher Scientific). Twenty cycles of PCR were performed in the following conditions: 98°C for 10 sec, 58°C for 30 sec, and 72°C for 30 sec. Biotinylated PCR products were enriched using the Dynabeads MyOne streptavidin C1 (catalog number: 65002; Thermo Fisher Scientific), followed by an additional digestion with blocking enzymes for 2 h. Biotinylated PCR products were eluted from the beads by 30 min incubation with 95% formamide/10mM EDTA at 65°C, and purified using Gel Extraction Kit (catalog number: 2870; Qiagen). In the second round of PCR, the purified products were amplified with EM-PCR in an oil-surfactant mixture. The emulation mixture was divided into individual aliquots and PCR was performed using the following conditions: 20 cycles of 94°C for 30 sec, 60°C for 30 sec, and 72°C for 1 min. The PCR products were pooled and centrifuged for 5 min at 14,000 rpm to separate the PCR product-containing phase and the oil layer. The layer was removed and the PCR products were extracted with diethyl ether three times. EM-PCR amplicons were purified using the Gel Extraction Kit. The third round of PCR (10 cycles) was performed with the same primers as in the second round of PCR, but with the addition of linkers and barcodes for Illumina Mi-seq sequencing. The third round PCR products were size-fractionated for DNA fragments between 300 and 1,000 base pairs on a 1% agarose gel (catalog number: 1613102; Bio-Rad). The PCR products containing Illumina barcodes were extracted with the Gel Extraction Kit.

Nucleotide sequences of junctions were generated by Mi-seq (Illumina NS500 SE150 or PE250) sequencing at the Molecular Biology Core Facility of the Dana-Farber Cancer Institute. At least three independent libraries were generated in fibroblast, and each APOBEC library in primary B cells were pooled together to reach the similar number of translocation junctions.

**HTGTS data analysis**

***Data process and alignment.*** HTGTS sequences in library were processed and aligned as previously described6. Briefly, reads for each experimental condition were demultiplexed by designed barcodes. To enhance specificity and ensure analyzed sequences containing bait portion, reads were further filtered by the presence of primer plus additional 5 downstream bases. The barcode, primer and bait portion of the remained sequences were masked for alignment analysis. Next, the processed sequences were aligned to mouse genome (mm9) using BLAT, and finally aligned sequences were further cleaned by removing PCR repeats (reads with same junction position in alignment to the reference genome and a start position in the read less than 3 bp apart), invalid alignments (including alignment scores < 30, reads with multiple alignments having a score difference < 4 and alignments having 10-nucleotide gaps) and ligation artifacts (for example, random HaeIII restriction sites ligated to bait breaksite). Translocation junction position was determined based on the genomic position of the 5’ end of the aligned read.

***Cluster identification.*** Based on translocation junctions pooled from biological replicates, we identified translocation clusters. The FCRs were identified by RIDER v1.0 that we developed6. The initial optimized event clusters were calculated by employing the Particle Swarm Optimization (PSO) algorithm based on nearest-neighbor distance, achieving fitness goal of maximum event count and minimum event compactness with restriction on their tolerance setting. The local background *p-*value was calculated by Poisson distribution against the region that surrounds the hotspot (+ 3 times the size of the hotspot). The multiple comparison correction was calculated by using the Holm-Bonferroni Method to deal with familywise error rates (FWER), the adjusted *p*-value considered as significance level for local hotspots call is 0.01 and for differential call against the vehicle control is 0.05. Furthermore, we eliminated the following sites: (1) the region + 2Mb around bait Myc breakpoints; (2) the regions with shared plasmid sequences, and (3) I-SceI off-targets with junctions’ number less than 8. All cluster hotspots overlapped or with gaps less than 2 kb were merged. For DCRs identification, we first excluded all FCRs junctions from each pooled HTGTS experiment data to avoid the FCRs’ influence, then detected regions where HTGTS junctions were significantly enriched against globally genome-wide background and significantly differentially presented against vehicle control by employing SICER 27. The parameters were as follows: window size, 100,000; gap size, 100,000; cluster islands fdr, 0.01; e value, 10; redundancy threshold, 1; effective genome fraction, 0.77 for mouse; significant changes fdr, 0.01. We used scanning window with 5 kb for FCRs and 0.25 Mb for DCRs. All cluster regions overlapped or with gaps less than 2 kb were merged. For two DCRs regions separately identified from two conditions, they were considered to commonly occur in both conditions if overlapping more than 50 kb.

**Replication timing analysis**

The replication timing profile data of WT MEF was acquired from GEO database (accession: GSM450291) generated by nascent-DNA from early (1st half of S) and late (2nd half of S) stages of S-phase. The START-R was used to identify the early and late constant timing regions (CTRs) and transition timing regions (TTRs)8. The early/late ratios scatter was plotted by R package ggplot2, the translocation clusters ratios were interpolated based on the fitted LOWESS curve.

**Hi-C data analysis**

The Hi-C raw data of WT MEF were acquired from GEO database, including three biological replicates (accession: GSM2602196, GSM2602198, GSM2602201). HiC-Pro was used to process Hi-C data9, including aligning raw fastq reads to mouse reference genome (mm9) by Bowtie2 v2.4.4, assigning fragments, filtering valid pairs, merging replicated samples, and building the overall contact maps normalized by ICE algorithm. The file merging all valid pairs from replicated samples was further converted to .hic file for downstream input in Juicer analysis10. The arrowhead algorithm in juicer tools was employed to find TADs at resolution 10 kb. The eigenvector was used to delineate compartments in Hi-C data at 1 Mb resolution. The sign of the eigenvector typically indicates the compartment type A/B (active/inactive).

**RNA-seq and ChIP-seq data analysis**

The processed RNA-seq data of mouse tail tip fibroblast WT was directly acquired from GEO database (accession: GSM1164892), where the reads were aligned to mm9 with the TopHat algorithm and RPKM was calculated as expression level. The ChIP-seq data were acquired from GEO database (accession Pol2: GSM2058852, H3K4me3: GSM1858314, H3K27ac: GSM1858323). The raw reads were aligned against to mouse genome (mm9) using BWA11. Aligned BAM files are filtered by removing low quality and unpaired reads, and de-duplicated. Based on the processed BAM files, peak calling is performed using MACS2 peak caller12.

**Mutational analysis using HTGTS datasets**

The sequences of translocation junctions identified from HTGTS data were used to analyze the mutational signatures related to translocation. The junction sequences trimmed with barcode, primer and bait portion were aligned to mouse genome mm9 by using BWA mem algorithm11. The samtools was implemented to generate, sort, index and mpileup bam file. Next, the VarScan v2.3.9 mpileup2snp13 was utilized to call base mutation and get vcf file, from which the regions of +2Mb around Myc break site and ISceI off-targets were further excluded to avoid the influence of technical bias. Based on a clean vcf file, the R package MutationalPatterns was employed to calculate 96 trinucleotide mutation count matrix14. In addition, the C>T in the WRC, YTCA, RTCA context were separately calculated based on vcf file and mm9 reference by using custom R codes with packages Biostrings, BSgenome, vcfR.

**FACTS**

PC-9 cells were introduced DNA DSBs in intron 6 of *EML4*, intron 19 of *ALK*, intron 11 of *RET*, intron 33 of *ROS1*, and intron 11 of *NTRK1* by CRISPR/Cas9. Cells were selected with EGFR inhibitor osimertinib (100 nM) for 30 days by changing the media every other day. Fusions were detected by anchored multiplex PCR15 followed by sequencing and analysis16. Total nucleic acid (TNA) was extracted from cell pellets using a Promega Maxwell RSC instrument with a Promega Maxwell RSC SimplyRNA Kit (Madison WI). Libraries were prepared using a Boston Children’s Hospital custom assay from ArcherDX (Boulder, CO) whose targets include *ALK*, *ROS1*, *RET*, and *NTRK1*. Several primers were used to target the downstream exons of the targeted introns by CRISPR/Cas9. Libraries were sequenced on Illumina MiSeq instruments (San Diego, CA), and analyzed using Archer Analysis v5.0.6 software from ArcherDX and manually checking frame and protein domains.

**Analysis of pan-cancer whole-genome sequencing data**

We analyzed somatic mutations near genomic rearrangement breakpoints in the pan-cancer whole-genome sequencing dataset from our recent publication. This cohort consists of 2,658 whole-genome sequencing cases from the Pan-Cancer Analysis of Whole Genomes (PCAWG) consortium, along with 574 additional breast cancer cases from four published studies. We identified focally amplified regions by comparing the copy number profiles to the regional baseline, as described in our previous study. We then identified the structural variants defining the boundaries of these amplified regions and classified their types. We focused on the two most common types of structural variants at the amplification boundaries: fold-back inversions and inter-chromosomal translocations, which are genomic hallmarks of breakage-fusion-bridge and translocation-bridge processes, respectively. Subsequently, we collected point mutations near the structural variation breakpoints in genomic windows ranging from 10 bp to 100,000 bp, considering the orientation of breakpoints. For each tumor type, we assigned each point mutation to the pyrimidine-based 96-trinucleotide context to examine the mutational spectra.

**Statistical analysis**

The statistical analysis represented mean ± s.d. from three or more independent experiments. Data were analyzed by unpaired *t*-test for group differences and by two-way analysis of variance analysis of variance for condition and group differences together using GraphPad Prism v7.03 software.

**Data availability**

All sequencing data generated in this study have been deposited in the Gene Expression Omnibus (GEO) database under accession number GSE272585 (with a token for reviewer: upgpwqmohdqbpkf).

The WGS datasets generated by the PCAWG consortium are available through the ICGC 25K SFTP server under authorized access. Instructions for accessing the data can be found at ICGC ARGO Documentation (https://docs.icgc-argo.org/docs/data-access/icgc-25k-data#sftp-connection-details).

**Code availability**

Source code for genomic event analysis tool (GEAT)17 developed in our laboratory to perform the HTGTS and mutational analysis from patient samples has been deposited in the Zenodo database http://doi.org/10.5281/zenodo.6592772 and https://github.com/jakelee0711/APOBEC3, respectively.

**References**

1 Dickerson, S. K., Market, E., Besmer, E. & Papavasiliou, F. N. AID mediates hypermutation by deaminating single stranded DNA. *J Exp Med* **197**, 1291–1296 (2003). <https://doi.org/10.1084/jem.20030481>

2 Kinomoto, M. *et al.* All APOBEC3 family proteins differentially inhibit LINE-1 retrotransposition. *Nucleic Acids Res* **35**, 2955–2964 (2007). <https://doi.org/10.1093/nar/gkm181>

3 Zheng, Y. H. *et al.* Human APOBEC3F is another host factor that blocks human immunodeficiency virus type 1 replication. *J Virol* **78**, 6073–6076 (2004). <https://doi.org/10.1128/JVI.78.11.6073-6076.2004>

4 Dang, Y., Wang, X., Esselman, W. J. & Zheng, Y. H. Identification of APOBEC3DE as another antiretroviral factor from the human APOBEC family. *J Virol* **80**, 10522–10533 (2006). <https://doi.org/10.1128/JVI.01123-06>

5 Chiarle, R. *et al.* Genome-wide translocation sequencing reveals mechanisms of chromosome breaks and rearrangements in B cells. *Cell* **147**, 107–119 (2011). <https://doi.org/10.1016/j.cell.2011.07.049>

6 Compagno, M. *et al.* Phosphatidylinositol 3-kinase delta blockade increases genomic instability in B cells. *Nature* **542**, 489–493 (2017). <https://doi.org/10.1038/nature21406>

7 Zang, C. *et al.* A clustering approach for identification of enriched domains from histone modification ChIP-Seq data. *Bioinformatics* **25**, 1952–1958 (2009). <https://doi.org/10.1093/bioinformatics/btp340>

8 Hadjadj, D. *et al.* Efficient, quick and easy-to-use DNA replication timing analysis with START-R suite. *NAR Genom Bioinform* **2**, lqaa045 (2020). <https://doi.org/10.1093/nargab/lqaa045>

9 Servant, N. *et al.* HiC-Pro: an optimized and flexible pipeline for Hi-C data processing. *Genome Biol* **16**, 259 (2015). <https://doi.org/10.1186/s13059-015-0831-x>

10 Durand, N. C. *et al.* Juicer Provides a One-Click System for Analyzing Loop-Resolution Hi-C Experiments. *Cell Syst* **3**, 95–98 (2016). <https://doi.org/10.1016/j.cels.2016.07.002>

11 Li, H. & Durbin, R. Fast and accurate short read alignment with Burrows-Wheeler transform. *Bioinformatics* **25**, 1754–1760 (2009). <https://doi.org/10.1093/bioinformatics/btp324>

12 Zhang, Y. *et al.* Model-based analysis of ChIP-Seq (MACS). *Genome Biol* **9**, R137 (2008). <https://doi.org/10.1186/gb-2008-9-9-r137>

13 Koboldt, D. C. *et al.* VarScan 2: somatic mutation and copy number alteration discovery in cancer by exome sequencing. *Genome Res* **22**, 568–576 (2012). <https://doi.org/10.1101/gr.129684.111>

14 Manders, F. *et al.* MutationalPatterns: the one stop shop for the analysis of mutational processes. *BMC Genomics* **23**, 134 (2022). <https://doi.org/10.1186/s12864-022-08357-3>

15 Zheng, Z. *et al.* Anchored multiplex PCR for targeted next-generation sequencing. *Nat Med* **20**, 1479–1484 (2014). <https://doi.org/10.1038/nm.3729>

16 Church, A. J. *et al.* Recurrent EML4-NTRK3 fusions in infantile fibrosarcoma and congenital mesoblastic nephroma suggest a revised testing strategy. *Modern pathology : an official journal of the United States and Canadian Academy of Pathology, Inc* **31**, 463–473 (2018). <https://doi.org/10.1038/modpathol.2017.127>

17 Wang, Q. A. qwang-flyinggene/GEAT:GEAT v0.1. *Zenodo* [**https://doi.org/10.5281/zenodo.6592772**](https://doi.org/10.5281/zenodo.6592772) (2022). <https://doi.org/https://doi.org/10.5281/zenodo.6592772>
