# Supplementary material
Source: Research Square preprint supplement (doi:10.21203/rs.3.rs-9060910/v1)
Supplement: Supplementary file 3 [file a74b86e2097dc6a53265b098.docx]

**Supplementary Table 2. Summary of DCRs identified in mouse fibroblasts transduced with human AID and each APOBEC3.**

| **Chr** | **Start** | **End** | **A3A** | **A3B** | **A3C** | **A3D** | **A3F** | **A3G** | **A3H** | **AID** |
| --- | --- | --- | --- | --- | --- | --- | --- | --- | --- | --- |
| chr1 | 39500000 | 40499999 | yes | no | no | no | no | no | yes | no |
| chr1 | 59200000 | 59499999 | no | yes | no | no | no | no | no | no |
| chr1 | 64600000 | 64899999 | no | no | no | no | yes | no | no | no |
| chr1 | 73900000 | 74499999 | yes | no | no | yes | no | yes | yes | no |
| chr1 | 74900000 | 75599999 | no | yes | yes | no | no | no | yes | no |
| chr1 | 89100000 | 89599999 | no | no | no | yes | no | no | no | no |
| chr1 | 92100000 | 94099999 | no | no | no | no | no | no | no | yes |
| chr1 | 94500000 | 95499999 | yes | no | yes | yes | no | no | no | no |
| chr1 | 133600000 | 134399999 | yes | yes | no | yes | no | yes | yes | no |
| chr1 | 136200000 | 138199999 | no | no | no | no | no | no | no | yes |
| chr1 | 182700000 | 183199999 | yes | no | no | no | no | no | no | no |
| chr1 | 192700000 | 193299999 | no | no | no | no | no | no | no | yes |
| chr2 | 5100000 | 5799999 | yes | no | no | no | no | yes | no | no |
| chr2 | 13200000 | 13599999 | no | no | no | yes | no | yes | no | yes |
| chr2 | 24900000 | 25699999 | no | yes | yes | yes | no | no | no | no |
| chr2 | 29000000 | 33799999 | yes | no | no | no | no | no | no | no |
| chr2 | 38200000 | 38599999 | no | no | no | yes | no | no | no | no |
| chr2 | 60200000 | 60699999 | no | no | no | no | no | yes | no | no |
| chr2 | 84400000 | 84599999 | no | no | no | no | no | yes | no | no |
| chr2 | 91300000 | 93999999 | yes | no | yes | yes | yes | yes | yes | yes |
| chr2 | 102600000 | 102799999 | no | no | no | no | no | yes | no | no |
| chr2 | 120900000 | 121299999 | no | no | no | no | yes | no | yes | no |
| chr2 | 126100000 | 126599999 | no | no | no | no | no | no | no | yes |
| chr2 | 130100000 | 132099999 | yes | no | no | yes | no | yes | yes | no |
| chr2 | 143700000 | 144299999 | no | no | yes | no | no | no | no | no |
| chr2 | 154400000 | 154599999 | no | no | no | no | no | no | yes | no |
| chr2 | 156600000 | 157299999 | no | no | no | no | no | no | no | yes |
| chr2 | 157600000 | 158499999 | no | yes | no | no | yes | yes | no | no |
| chr2 | 164400000 | 166299999 | yes | yes | no | yes | no | yes | yes | no |
| chr2 | 172700000 | 173299999 | yes | no | yes | yes | no | yes | no | no |
| chr3 | 41000000 | 41399999 | no | no | no | no | no | no | no | yes |
| chr3 | 65500000 | 65999999 | no | no | no | no | no | yes | no | no |
| chr3 | 83800000 | 84499999 | yes | yes | no | yes | no | yes | no | yes |
| chr3 | 85400000 | 85599999 | no | yes | no | no | no | no | no | no |
| chr3 | 87500000 | 88599999 | yes | no | no | no | yes | no | no | no |
| chr3 | 95400000 | 96099999 | no | no | no | yes | no | no | yes | yes |
| chr3 | 96300000 | 96499999 | no | no | no | no | no | no | yes | no |
| chr3 | 97500000 | 97999999 | no | yes | no | no | no | no | no | no |
| chr3 | 102000000 | 102599999 | no | no | no | no | no | no | yes | no |
| chr3 | 103300000 | 103599999 | no | no | no | no | no | yes | no | no |
| chr3 | 107200000 | 108299999 | yes | no | no | yes | no | yes | yes | no |
| chr3 | 121000000 | 121499999 | no | no | yes | yes | no | no | no | yes |
| chr3 | 121700000 | 122599999 | yes | no | no | yes | no | yes | yes | no |
| chr3 | 145300000 | 145699999 | no | no | no | yes | no | no | no | no |
| chr4 | 57600000 | 58299999 | yes | yes | no | no | no | yes | no | no |
| chr4 | 88500000 | 88999999 | no | no | no | no | no | no | no | yes |
| chr4 | 107100000 | 107799999 | no | no | no | yes | no | no | no | yes |
| chr4 | 117600000 | 117999999 | no | yes | no | no | no | no | no | no |
| chr4 | 119700000 | 119999999 | no | no | no | no | no | no | no | yes |
| chr4 | 125700000 | 125999999 | yes | no | no | no | no | no | no | no |
| chr4 | 128400000 | 129799999 | yes | yes | no | yes | no | yes | no | no |
| chr4 | 131600000 | 133899999 | yes | no | no | yes | no | yes | yes | no |
| chr4 | 148600000 | 149699999 | no | no | no | yes | yes | no | yes | no |
| chr5 | 30700000 | 31299999 | no | no | no | no | yes | no | no | no |
| chr5 | 34500000 | 37399999 | yes | no | no | yes | yes | yes | yes | yes |
| chr5 | 53800000 | 53999999 | no | no | no | no | no | no | yes | yes |
| chr5 | 64600000 | 65299999 | yes | no | yes | no | no | no | yes | no |
| chr5 | 66300000 | 66799999 | no | no | no | no | no | yes | no | no |
| chr5 | 91000000 | 91199999 | no | no | yes | no | no | no | no | no |
| chr5 | 104000000 | 104399999 | no | yes | no | no | no | no | no | no |
| chr5 | 111500000 | 111799999 | yes | no | no | no | no | no | no | no |
| chr5 | 113600000 | 116099999 | yes | no | yes | no | no | yes | no | no |
| chr5 | 121500000 | 123099999 | yes | no | no | no | no | no | no | no |
| chr5 | 123300000 | 125999999 | yes | no | no | yes | yes | yes | yes | yes |
| chr5 | 134800000 | 135899999 | yes | no | no | no | no | no | no | no |
| chr5 | 137400000 | 138099999 | yes | no | no | no | no | no | no | no |
| chr5 | 139300000 | 139899999 | no | no | no | no | yes | no | yes | no |
| chr5 | 140100000 | 140299999 | no | no | no | no | no | no | yes | no |
| chr5 | 144000000 | 144499999 | no | no | no | no | no | yes | no | no |
| chr6 | 34200000 | 34999999 | yes | yes | yes | yes | yes | yes | yes | yes |
| chr6 | 83900000 | 84399999 | no | yes | no | no | no | no | no | no |
| chr6 | 86700000 | 86999999 | no | yes | no | no | no | no | no | no |
| chr6 | 87100000 | 87299999 | no | no | no | no | no | no | no | yes |
| chr6 | 87600000 | 88399999 | yes | no | no | yes | no | no | no | no |
| chr6 | 88500000 | 88999999 | yes | no | yes | yes | no | no | no | no |
| chr6 | 127900000 | 128399999 | no | no | no | yes | no | no | no | yes |
| chr6 | 146300000 | 146999999 | no | no | no | no | yes | no | no | no |
| chr7 | 4500000 | 4999999 | no | no | yes | no | no | no | no | no |
| chr7 | 16700000 | 17599999 | yes | no | no | no | no | no | no | yes |
| chr7 | 30100000 | 30299999 | no | no | no | no | no | yes | no | no |
| chr7 | 52100000 | 53399999 | no | yes | no | no | no | yes | no | no |
| chr7 | 74200000 | 74699999 | no | no | no | yes | no | no | no | no |
| chr7 | 86500000 | 88399999 | yes | yes | yes | yes | yes | yes | yes | yes |
| chr7 | 88900000 | 89999999 | yes | no | no | no | no | no | no | no |
| chr7 | 108000000 | 108099999 | no | no | no | no | no | no | yes | no |
| chr7 | 118900000 | 120199999 | yes | yes | yes | yes | no | yes | yes | yes |
| chr7 | 141100000 | 141399999 | no | yes | no | no | no | no | no | no |
| chr8 | 12600000 | 13699999 | no | no | yes | yes | no | no | yes | no |
| chr8 | 73800000 | 74199999 | yes | no | no | no | no | yes | yes | yes |
| chr8 | 86100000 | 87699999 | yes | no | yes | no | no | yes | no | no |
| chr8 | 89000000 | 89399999 | no | no | no | no | no | no | no | yes |
| chr8 | 113800000 | 114399999 | yes | no | no | yes | no | yes | yes | no |
| chr8 | 122100000 | 126099999 | yes | no | no | no | no | no | no | no |
| chr9 | 20600000 | 21799999 | yes | no | no | no | no | no | no | no |
| chr9 | 22900000 | 23199999 | no | no | no | no | yes | no | no | no |
| chr9 | 44400000 | 44699999 | no | yes | no | no | no | no | yes | no |
| chr9 | 50500000 | 51199999 | yes | no | no | no | no | no | no | no |
| chr9 | 56100000 | 57699999 | yes | yes | no | yes | yes | yes | no | no |
| chr9 | 62000000 | 64099999 | no | yes | yes | no | no | yes | no | no |
| chr9 | 96400000 | 96799999 | no | no | no | no | yes | no | no | no |
| chr9 | 102500000 | 103099999 | no | no | no | no | no | no | yes | no |
| chr9 | 107100000 | 108999999 | yes | yes | no | no | no | no | no | no |
| chr9 | 118900000 | 119299999 | no | yes | no | no | no | no | no | no |
| chr9 | 121500000 | 121899999 | no | no | no | yes | no | no | no | no |
| chr10 | 38700000 | 39399999 | no | no | no | yes | no | yes | no | no |
| chr10 | 58300000 | 61499999 | yes | no | yes | yes | yes | no | yes | yes |
| chr10 | 67000000 | 67599999 | no | no | yes | no | no | no | no | no |
| chr10 | 74900000 | 75499999 | no | yes | no | no | no | no | no | no |
| chr10 | 82200000 | 82699999 | no | yes | yes | yes | no | no | no | yes |
| chr10 | 83800000 | 83999999 | no | no | no | no | yes | no | no | no |
| chr10 | 85400000 | 85899999 | no | yes | no | yes | no | yes | no | no |
| chr10 | 90600000 | 90699999 | no | no | no | no | no | no | yes | no |
| chr10 | 92600000 | 93599999 | no | yes | no | yes | yes | no | no | yes |
| chr10 | 94000000 | 94399999 | no | no | no | no | no | no | no | yes |
| chr10 | 114700000 | 115299999 | yes | no | no | no | no | no | no | no |
| chr10 | 116400000 | 116699999 | no | no | no | yes | yes | no | no | no |
| chr10 | 126300000 | 128399999 | yes | no | no | yes | yes | no | yes | no |
| chr11 | 4500000 | 5199999 | yes | no | no | no | yes | no | yes | yes |
| chr11 | 5600000 | 6099999 | yes | no | no | no | no | no | no | yes |
| chr11 | 6200000 | 6599999 | yes | no | no | no | no | no | yes | no |
| chr11 | 45700000 | 46099999 | no | yes | no | no | no | no | no | no |
| chr11 | 50000000 | 50199999 | yes | no | no | no | no | no | no | no |
| chr11 | 59100000 | 59699999 | yes | no | no | no | no | no | no | no |
| chr11 | 59900000 | 60799999 | no | no | no | no | no | no | yes | no |
| chr11 | 68700000 | 68999999 | no | no | no | no | no | no | no | yes |
| chr11 | 70400000 | 70599999 | yes | no | no | no | no | no | no | no |
| chr11 | 77200000 | 78299999 | yes | no | no | no | no | no | no | no |
| chr11 | 78500000 | 79099999 | no | no | no | no | no | no | no | yes |
| chr11 | 79500000 | 79899999 | no | no | no | yes | no | no | no | yes |
| chr11 | 86200000 | 86799999 | no | no | no | no | no | yes | no | no |
| chr11 | 105900000 | 107599999 | yes | no | no | yes | yes | yes | yes | yes |
| chr11 | 115100000 | 116699999 | yes | no | no | no | no | no | no | no |
| chr11 | 117500000 | 118399999 | yes | no | yes | yes | yes | no | no | no |
| chr11 | 118800000 | 121299999 | yes | no | yes | no | no | no | no | no |
| chr12 | 70200000 | 70699999 | yes | no | no | no | no | no | no | no |
| chr12 | 71600000 | 72199999 | no | no | no | no | yes | yes | yes | no |
| chr12 | 85200000 | 87699999 | yes | no | no | no | no | no | yes | yes |
| chr12 | 103300000 | 103899999 | yes | no | no | no | no | no | no | no |
| chr13 | 23600000 | 23899999 | no | no | no | no | no | no | no | yes |
| chr13 | 43100000 | 43499999 | no | no | no | no | no | yes | no | no |
| chr13 | 49200000 | 49599999 | yes | no | no | no | no | no | no | no |
| chr13 | 51800000 | 52299999 | no | yes | no | yes | no | no | no | no |
| chr13 | 63100000 | 63499999 | yes | yes | no | yes | no | yes | yes | no |
| chr14 | 8600000 | 8999999 | no | no | yes | yes | no | yes | no | no |
| chr14 | 47100000 | 48199999 | yes | no | no | no | no | no | no | no |
| chr14 | 56100000 | 56599999 | yes | no | no | no | no | no | no | no |
| chr14 | 69900000 | 70899999 | no | no | no | no | no | yes | no | no |
| chr14 | 121500000 | 121899999 | no | yes | no | no | no | no | no | no |
| chr15 | 6200000 | 7199999 | no | no | no | yes | no | no | yes | yes |
| chr15 | 7300000 | 7499999 | no | no | no | yes | no | no | no | no |
| chr15 | 10400000 | 10999999 | no | no | yes | yes | no | no | no | yes |
| chr15 | 11400000 | 12899999 | no | no | no | yes | no | no | yes | yes |
| chr15 | 25300000 | 25899999 | yes | no | no | no | no | no | yes | no |
| chr15 | 31300000 | 31799999 | no | no | no | no | no | no | yes | no |
| chr15 | 32200000 | 32599999 | no | no | no | no | no | yes | no | no |
| chr15 | 50700000 | 50999999 | no | no | no | no | yes | no | no | no |
| chr15 | 51400000 | 51799999 | no | no | no | no | no | no | no | yes |
| chr15 | 52900000 | 53599999 | no | no | no | no | no | no | yes | no |
| chr15 | 54500000 | 55899999 | no | no | no | yes | no | no | yes | no |
| chr15 | 56500000 | 56699999 | no | no | no | no | yes | no | no | no |
| chr15 | 57200000 | 59499999 | yes | no | no | no | no | no | yes | no |
| chr15 | 63800000 | 64499999 | no | no | no | no | no | no | yes | no |
| chr15 | 71300000 | 71699999 | no | no | no | no | no | no | no | yes |
| chr15 | 72400000 | 77299999 | yes | no | no | no | no | no | yes | no |
| chr15 | 77500000 | 82299999 | yes | no | no | no | no | no | no | no |
| chr15 | 82600000 | 86799999 | yes | no | no | no | no | no | yes | no |
| chr15 | 95900000 | 96599999 | no | no | yes | no | no | no | no | no |
| chr15 | 98300000 | 103399999 | yes | no | no | no | no | no | no | no |
| chr16 | 3900000 | 5199999 | yes | yes | yes | yes | yes | yes | yes | no |
| chr16 | 10600000 | 11299999 | yes | no | no | no | no | no | no | no |
| chr16 | 17100000 | 18799999 | yes | no | yes | yes | yes | yes | yes | no |
| chr16 | 20300000 | 20799999 | no | no | no | yes | no | no | yes | no |
| chr16 | 24700000 | 24999999 | no | no | no | yes | no | no | no | no |
| chr16 | 31300000 | 31699999 | yes | no | no | no | no | no | yes | no |
| chr16 | 32500000 | 33099999 | yes | no | no | yes | no | yes | no | yes |
| chr16 | 35200000 | 35599999 | no | no | no | yes | no | no | no | no |
| chr16 | 92400000 | 93099999 | no | no | no | yes | no | no | yes | no |
| chr17 | 5700000 | 6199999 | yes | no | no | no | no | no | no | no |
| chr17 | 23800000 | 28699999 | yes | no | no | no | no | yes | yes | yes |
| chr17 | 31700000 | 32499999 | no | no | no | yes | no | no | no | no |
| chr17 | 44600000 | 45099999 | no | no | no | no | yes | no | yes | no |
| chr17 | 45800000 | 47099999 | yes | no | yes | yes | yes | yes | yes | no |
| chr17 | 47500000 | 48099999 | no | no | no | yes | no | no | no | no |
| chr17 | 75300000 | 75799999 | no | no | no | yes | yes | yes | no | no |
| chr17 | 79500000 | 79999999 | no | no | no | yes | no | no | yes | no |
| chr18 | 35400000 | 36099999 | no | no | no | no | no | no | yes | no |
| chr18 | 67500000 | 67699999 | no | no | no | yes | no | no | no | no |
| chr18 | 75400000 | 75799999 | no | no | no | yes | no | no | no | no |
| chr18 | 80400000 | 81099999 | yes | no | no | yes | yes | yes | yes | no |
| chr19 | 6900000 | 7599999 | yes | no | yes | no | yes | no | yes | yes |
| chr19 | 10600000 | 11099999 | no | no | no | yes | no | no | no | no |
| chr19 | 28300000 | 28599999 | no | no | no | yes | no | no | no | no |
| chr19 | 40400000 | 40599999 | no | no | no | no | no | no | yes | no |
| chr19 | 41900000 | 42499999 | yes | no | no | no | no | no | no | no |
| chr19 | 43600000 | 44499999 | no | no | yes | no | no | yes | no | no |
| chr19 | 46100000 | 47999999 | yes | no | no | no | no | no | no | no |
| chr19 | 53300000 | 53699999 | no | no | no | no | no | yes | no | no |
| chr19 | 55300000 | 56599999 | yes | no | no | yes | no | no | no | no |
| chrX | 45400000 | 45799999 | no | no | no | no | yes | no | no | no |
| chrX | 98700000 | 99399999 | no | no | no | no | yes | no | no | no |
