# Supplementary material
Source: Research Square preprint supplement (doi:10.21203/rs.3.rs-9060910/v1)
Supplement: Supplementary file 4 [file e766df67176644890eebce4d.docx]

| **Supplementary Table 1. Summary of FCRs identified in mouse fibroblasts transduced with human AID and each APOBEC3.** | | | | | | | | | | | | | |
| --- | --- | --- | --- | --- | --- | --- | --- | --- | --- | --- | --- | --- | --- |
| **Chr** | **Start** | **End** | **Gene** | **Category** | **A3A** | **A3B** | **A3C** | **A3D** | **A3F** | **A3G** | **A3H** | **AID** |
| chr1 | 137630641 | 137654518 | Csrp1 | A3-only | no | no | no | no | no | no | yes | no |
| chr1 | 184411938 | 184423809 | Capn2 | A3-only | no | no | no | no | yes | no | no | no |
| chr2 | 13496160 | 13497010 | Vim | AID-only | no | no | no | no | no | no | no | yes$ |
| chr2 | 32470780 | 32491105 | Ak1 | AID-only | no | no | no | no | no | no | no | Yes# |
| chr2 | 33055016 | 33102811 | Ralgps1;Angptl2 | A3-only | no | no | no | no | yes | no | no | no |
| chr2 | 117935716 | 117952891 | Thbs1 | AID/A3-mixed | no | no | yes | no | yes | no | yes | yes*$ |
| chr2 | 130101712 | 130106248 | Nop56 | A3-only | no | no | no | no | no | no | yes | no |
| chr2 | 152559528 | 152571859 | Id1 | A3-only | no | yes | no | no | no | no | no | no |
| chr2 | 181652481 | 181653371 | NA | A3-only | yes | no | no | no | no | no | no | no |
| chr3 | 58219441 | 58221150 | Tsc22d2 | AID-only | no | no | no | no | no | no | no | yes$ |
| chr3 | 88282672 | 88310110 | Lmna | AID/A3-mixed | no | no | no | yes | no | yes | no | yes# |
| chr3 | 90386868 | 90420969 | S100a6 | AID/A3-mixed | no | no | yes | no | no | no | no | yes*$ |
| chr3 | 107535658 | 107563467 | Csf1 | AID/A3-mixed | yes | no | yes | no | yes | yes | yes | yes*$ |
| chr3 | 107626292 | 107634602 | NA | A3-only | yes | no | no | no | no | no | no | no |
| chr3 | 145306638 | 145317590 | Cyr61 | AID/A3-mixed | no | no | no | no | yes | no | yes | yes*$ |
| chr4 | 125912103 | 125940888 | Mtap7d1 | A3-only | no | no | no | no | yes | no | no | no |
| chr4 | 135691476 | 135704727 | Id3 | A3-only | no | yes | no | no | no | no | no | no |
| chr4 | 150229449 | 150229979 | Errfi1 | AID-only | no | no | no | no | no | no | no | yes$ |
| chr5 | 32435620 | 32472332 | Fosl2 | A3-only | no | no | yes | no | yes | no | no | no |
| chr5 | 114803720 | 114820323 | Kctd10 | A3-only | no | no | no | no | no | no | yes | no |
| chr5 | 125862906 | 125871929 | Ubc | A3-only | no | no | no | no | no | yes | yes | no |
| chr5 | 137503761 | 137559664 | Serpine1 | A3-only | no | yes | no | yes | no | no | no | no |
| chr5 | 143663106 | 143669354 | Actb | AID/A3-mixed | no | no | no | no | no | no | yes | yes# |
| chr6 | 31005564 | 31040758 | Mir29a | AID/A3-mixed | yes | no | yes | yes | yes | yes | no | yes# |
| chr6 | 34695187 | 34725157 | Cald1 | A3-only | no | no | no | yes | no | no | no | no |
| chr6 | 122511128 | 122511329 | Aicda | AID-only | no | no | no | no | no | no | no | yes# |
| chr7 | 29672875 | 29747022 | Actn4 | AID/A3-mixed | no | no | no | yes | yes | yes | yes | yes# |
| chr7 | 52713031 | 52718224 | Ftl1 | AID-only | no | no | no | no | no | no | no | yes$ |
| chr8 | 124698660 | 124718189 | NA | A3-only | no | no | no | no | yes | no | no | no |
| chr8 | 129106014 | 129120006 | Irf2bp2 | AID-only | no | no | no | no | no | no | no | yes$ |
| chr9 | 20682717 | 20727834 | Dnmt1 | A3-only | no | no | no | no | yes | no | no | no |
| chr9 | 41390356 | 41406336 | 2610203C20Rik | A3-only | no | yes | yes | yes | yes | yes | yes | no |
| chr9 | 44301175 | 44319744 | Bcl9l | A3-only | yes | no | no | no | no | no | no | no |
| chr9 | 59505647 | 59524467 | Pkm | A3-only | no | no | no | yes | no | no | no | no |
| chr9 | 63681400 | 63698541 | NA | A3-only | no | no | no | yes | no | no | no | no |
| chr9 | 66868210 | 66888136 | Tpm1 | A3-only | no | no | yes | yes | no | no | yes | no |
| chr9 | 102616815 | 102642780 | Amotl2 | AID/A3-mixed | yes | yes | yes | yes | yes | yes | yes | yes# |
| chr10 | 17443577 | 17444198 | Cited2 | AID-only | no | no | no | no | no | no | no | yes$ |
| chr10 | 24315566 | 24320011 | Ctgf | AID/A3-mixed | no | no | no | yes | no | yes | no | yes*$ |
| chr10 | 76672593 | 76683887 | NA | AID-only | no | no | no | no | no | no | no | yes# |
| chr10 | 79310633 | 79361943 | Ptbp1 | AID/A3-mixed | no | yes | yes | no | yes | yes | yes | yes# |
| chr10 | 79429159 | 79474018 | Grin3b;Cnn2 | A3-only | no | yes | no | yes | no | yes | no | no |
| chr10 | 79579965 | 79634843 | Stk11;Cbarp;Midn | A3-only | no | no | no | no | yes | no | no | no |
| chr10 | 79703845 | 79751689 | Dazap1 | A3-only | yes | no | no | no | no | no | no | no |
| chr10 | 80637475 | 80644600 | Eef2 | A3-only | no | no | no | no | no | yes | no | no |
| chr10 | 80848905 | 80883535 | Nfic | A3-only | yes | no | no | no | no | no | no | no |
| chr10 | 119912017 | 119912882 | Hmga2 | AID-only | no | no | no | no | no | no | no | yes$ |
| chr11 | 3073482 | 3101390 | Sfi1 | A3-only | yes | no | no | no | no | no | no | no |
| chr11 | 5768783 | 5775072 | Aebp1;Pold2 | A3-only | no | no | no | yes | no | no | no | no |
| chr11 | 8559720 | 8579109 | Tns3 | AID-only | no | no | no | no | no | no | no | yes$ |
| chr11 | 53953945 | 53954191 | NA | A3-only | yes | no | no | no | no | no | no | no |
| chr11 | 55207987 | 55255451 | Sparc | A3-only | no | no | no | no | yes | no | no | no |
| chr11 | 86383866 | 86399531 | Vmp1;Mir21 | AID/A3-mixed | yes | yes | yes | yes | yes | yes | yes | yes# |
| chr11 | 94802998 | 94816647 | Col1a1 | AID/A3-mixed | no | no | yes | yes | yes | no | yes | yes# |
| chr11 | 97845847 | 97853782 | Arl5c | A3-only | no | no | no | no | no | no | yes | no |
| chr11 | 98580129 | 98648586 | Thra;Nr1d1 | A3-only | no | no | yes | no | no | no | no | no |
| chr11 | 119312217 | 119327621 | Rnf213 | A3-only | no | yes | no | no | no | no | no | no |
| chr11 | 120206476 | 120210518 | Actg1 | AID/A3-mixed | no | no | no | yes | no | no | yes | yes |
| chr12 | 81250551 | 81361027 | Actn1 | A3-only | yes | yes | yes | no | yes | yes | yes | no |
| chr12 | 88223117 | 88225318 | Irf2bpl | AID-only | no | no | no | no | no | no | no | yes$ |
| chr12 | 113830886 | 113863013 | Inf2 | A3-only | no | no | no | no | no | yes | no | no |
| chr13 | 3372159 | 3372971 | NA | A3-only | yes | no | no | no | no | no | no | no |
| chr13 | 55595849 | 55615173 | Pdlim7 | A3-only | yes | no | no | no | no | no | no | no |
| chr15 | 7807580 | 7827037 | Wdr70 | A3-only | no | no | no | no | no | no | yes | no |
| chr15 | 38381028 | 38399309 | NA | AID-only | no | no | no | no | no | no | no | yes# |
| chr15 | 41620685 | 41621263 | Oxr1 | AID-only | no | no | no | no | no | no | no | yes$ |
| chr15 | 53041955 | 53058906 | Ext1 | A3-only | no | no | no | no | no | yes | no | no |
| chr15 | 53175873 | 53178527 | Ext1 | AID-only | no | no | no | no | no | no | no | yes$ |
| chr15 | 57792540 | 57825535 | Wdr67;Fam83a | A3-only | yes | no | no | no | no | no | no | no |
| chr15 | 59432407 | 59594826 | Trib1 | AID/A3-mixed | yes | no | no | yes | no | no | yes | yes# |
| chr15 | 59609311 | 59628823 | Gm19510 | A3-only | no | yes | no | no | no | no | no | no |
| chr15 | 59631863 | 59698621 | NA | A3-only | no | no | no | no | no | no | yes | no |
| chr15 | 63903629 | 63971772 | Asap1 | A3-only | yes | yes | no | no | no | no | no | no |
| chr15 | 63997535 | 64044745 | Asap1 | A3-only | yes | no | no | no | no | no | no | no |
| chr15 | 64052022 | 64079609 | Asap1 | A3-only | yes | no | no | no | no | no | no | no |
| chr15 | 64092411 | 64121098 | Asap1 | A3-only | yes | no | no | no | no | no | no | no |
| chr15 | 64130576 | 64150200 | Asap1 | AID/A3-mixed | yes | no | no | no | no | no | no | yes*$ |
| chr15 | 64176654 | 64194844 | Asap1 | A3-only | yes | no | no | no | no | no | no | no |
| chr15 | 64213795 | 64215378 | Asap1 | AID-only | no | no | no | no | no | no | no | yes$ |
| chr15 | 74917170 | 74917450 | NA | A3-only | no | no | no | no | no | no | yes | no |
| chr15 | 75604571 | 75651107 | Zc3h3 | A3-only | yes | no | no | no | no | no | no | no |
| chr15 | 75714394 | 75750733 | Eef1d;Tigd5 | A3-only | yes | no | no | no | no | yes | no | no |
| chr15 | 75867266 | 75928843 | Scrib;Puf60 | A3-only | yes | no | no | no | no | no | no | no |
| chr15 | 75993645 | 76044265 | Plec | AID/A3-mixed | yes | no | no | no | no | yes | yes | yes*$ |
| chr15 | 76128705 | 76138007 | Oplah | A3-only | yes | no | no | no | no | no | no | no |
| chr15 | 76155143 | 76193542 | Sharpin;Maf1 | A3-only | yes | no | no | no | no | no | no | no |
| chr15 | 76453494 | 76485819 | Cyhr1 | A3-only | yes | no | no | no | no | no | no | no |
| chr15 | 76515298 | 76556174 | Ppp1r16a;Gpt | A3-only | yes | no | no | no | no | no | no | no |
| chr15 | 77583153 | 77681789 | Myh9 | AID/A3-mixed | yes | yes | yes | yes | yes | yes | yes | yes*$ |
| chr15 | 77732861 | 77772338 | Txn2 | A3-only | no | no | no | yes | no | yes | no | no |
| chr15 | 78657324 | 78688889 | Cdc42ep1;Lgals2 | A3-only | yes | no | no | no | no | yes | no | no |
| chr15 | 78707213 | 78766205 | Lgals1 | AID/A3-mixed | yes | no | no | no | no | no | yes | yes# |
| chr15 | 78801292 | 78826850 | Triobp;Gm10865 | A3-only | yes | no | no | no | no | no | no | no |
| chr15 | 78850779 | 78868066 | H1f0;Gcat | A3-only | yes | no | no | no | no | no | no | no |
| chr15 | 79272744 | 79359874 | Kdelr3;Ddx17 | A3-only | yes | yes | no | no | no | no | no | no |
| chr15 | 79550978 | 79665877 | Sun2;Npcd | A3-only | yes | no | yes | no | no | no | no | no |
| chr15 | 79902665 | 79913367 | Rpl3 | AID/A3-mixed | no | yes | yes | yes | no | yes | yes | yes# |
| chr15 | 80837580 | 80857036 | Sgsm3;Mkl1 | A3-only | no | no | no | no | no | no | yes | no |
| chr15 | 81687691 | 81698701 | Tob2 | A3-only | no | yes | no | no | no | no | no | no |
| chr15 | 85480031 | 85537401 | Mirlet7c-2 | AID/A3-mixed | yes | no | no | no | no | no | no | yes# |
| chr15 | 97577678 | 97643571 | Slc48a1;Hdac7 | AID-only | no | no | no | no | no | no | no | yes# |
| chr15 | 98660271 | 98685955 | Prkag1;Mll2 | A3-only | no | no | no | yes | no | no | no | no |
| chr15 | 98761253 | 98764845 | Tuba1b | A3-only | no | no | no | no | yes | no | no | no |
| chr15 | 99608460 | 99650519 | Lima1 | A3-only | no | no | no | no | no | no | yes | no |
| chr15 | 101921868 | 101951271 | Eif4b;Tns2 | A3-only | yes | yes | no | yes | no | no | no | no |
| chr15 | 102032823 | 102189136 | Itgb7;Rarg | A3-only | yes | no | no | no | yes | no | no | no |
| chr15 | 102199863 | 102212342 | Sp7 | A3-only | yes | no | no | no | no | no | no | no |
| chr15 | 102741435 | 102836424 | Hoxc11 | AID-only | no | no | no | no | no | no | no | yes$ |
| chr15 | 102995956 | 103046783 | Cbx5 | A3-only | no | no | no | no | no | no | yes | no |
| chr15 | 103071037 | 103078824 | Hnrnpa1;Nfe2 | A3-only | no | no | no | no | no | no | yes | no |
| chr16 | 92609677 | 92626723 | Runx1 | A3-only | no | no | no | no | yes | no | no | no |
| chr17 | 24683052 | 24751562 | Pkd1;Tsc2 | A3-only | no | no | no | no | no | no | yes | no |
| chr17 | 26639128 | 26674305 | Dusp1 | AID/A3-mixed | yes | no | no | no | no | no | no | yes# |
| chr17 | 27693753 | 27695511 | Hmga1 | AID-only | no | no | no | no | no | no | no | yes$ |
| chr17 | 28464486 | 28490688 | Rpl10a;Tead3 | A3-only | yes | no | yes | no | no | no | no | no |
| chr17 | 29235440 | 29237465 | Cdkn1a | A3-only | no | yes | no | no | no | no | no | no |
| chr17 | 34233947 | 34261758 | Brd2 | A3-only | yes | no | yes | no | yes | no | yes | no |
| chr17 | 39980124 | 39985774 | Rn45s | AID/A3-mixed | yes | no | no | no | no | no | yes | yes# |
| chr18 | 61796110 | 61825322 | Carmn | AID/A3-mixed | yes | no | yes | no | no | yes | yes | yes# |
| chr18 | 75522468 | 75556649 | Smad7 | A3-only | no | yes | yes | no | no | no | yes | no |
| chr19 | 5037700 | 5101105 | Brms1;Rin1 | A3-only | yes | no | no | no | no | no | yes | no |
| chr19 | 5667859 | 5862625 | Ltbp3;Malat1;Neat1 | AID/A3-mixed | no | no | no | yes | yes | yes | no | yes# |
| chr19 | 8798566 | 8801804 | Snhg1;Snord22 | A3-only | no | no | no | yes | yes | no | no | no |
| chr19 | 9052965 | 9094614 | Ahnak | AID/A3-mixed | yes | yes | yes | yes | yes | yes | yes | yes# |
| chrX | 71470037 | 71480506 | Flna | A3-only | no | no | no | yes | no | no | yes | no |
| *AID shows TSS/gene body-mixed pattern, $AID shows TSS pattern, #AID shows Gene body pattern. | | | | | | | | | | | | | |
