# Supplementary material
Source: Research Square preprint supplement (doi:10.21203/rs.3.rs-9060910/v1)

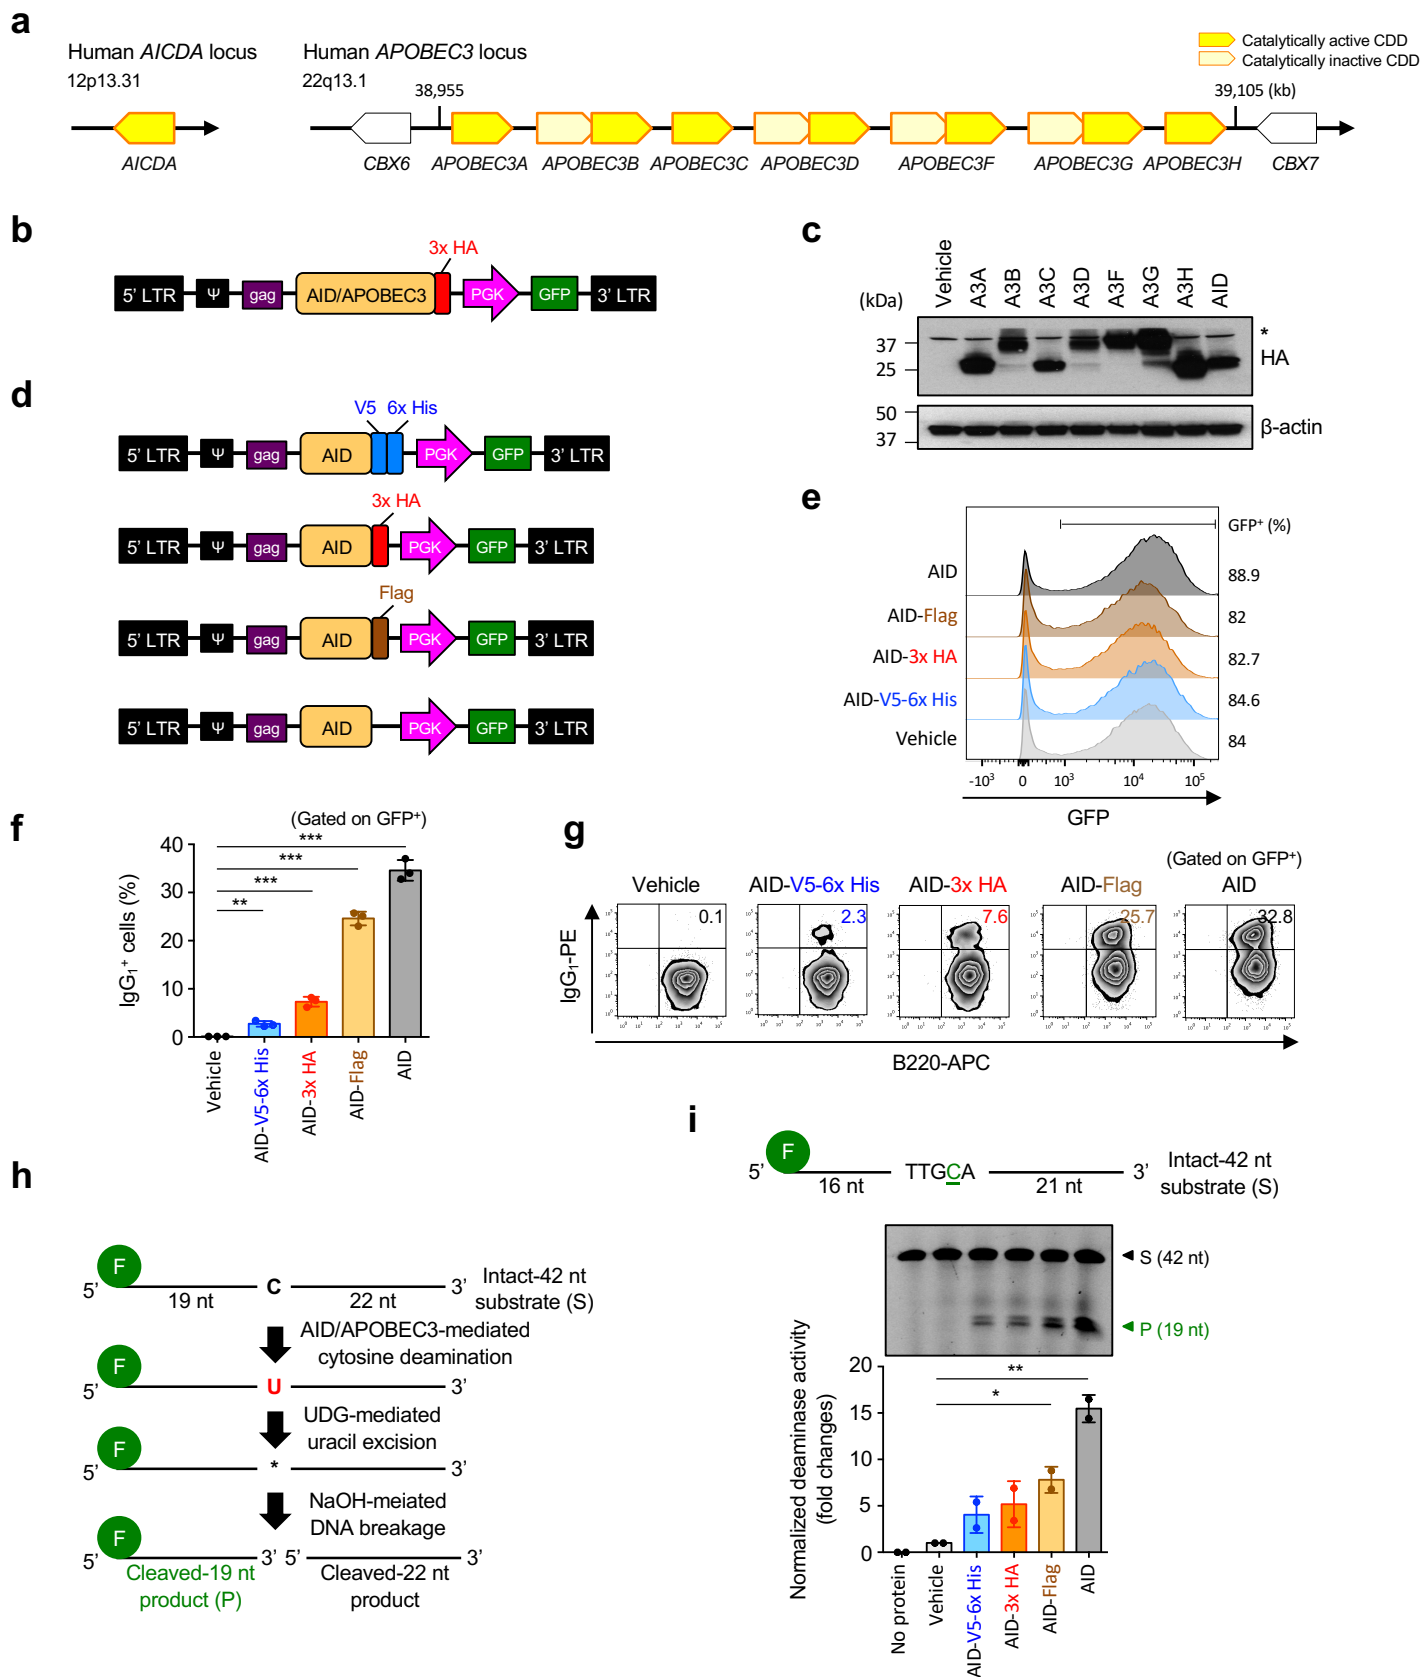

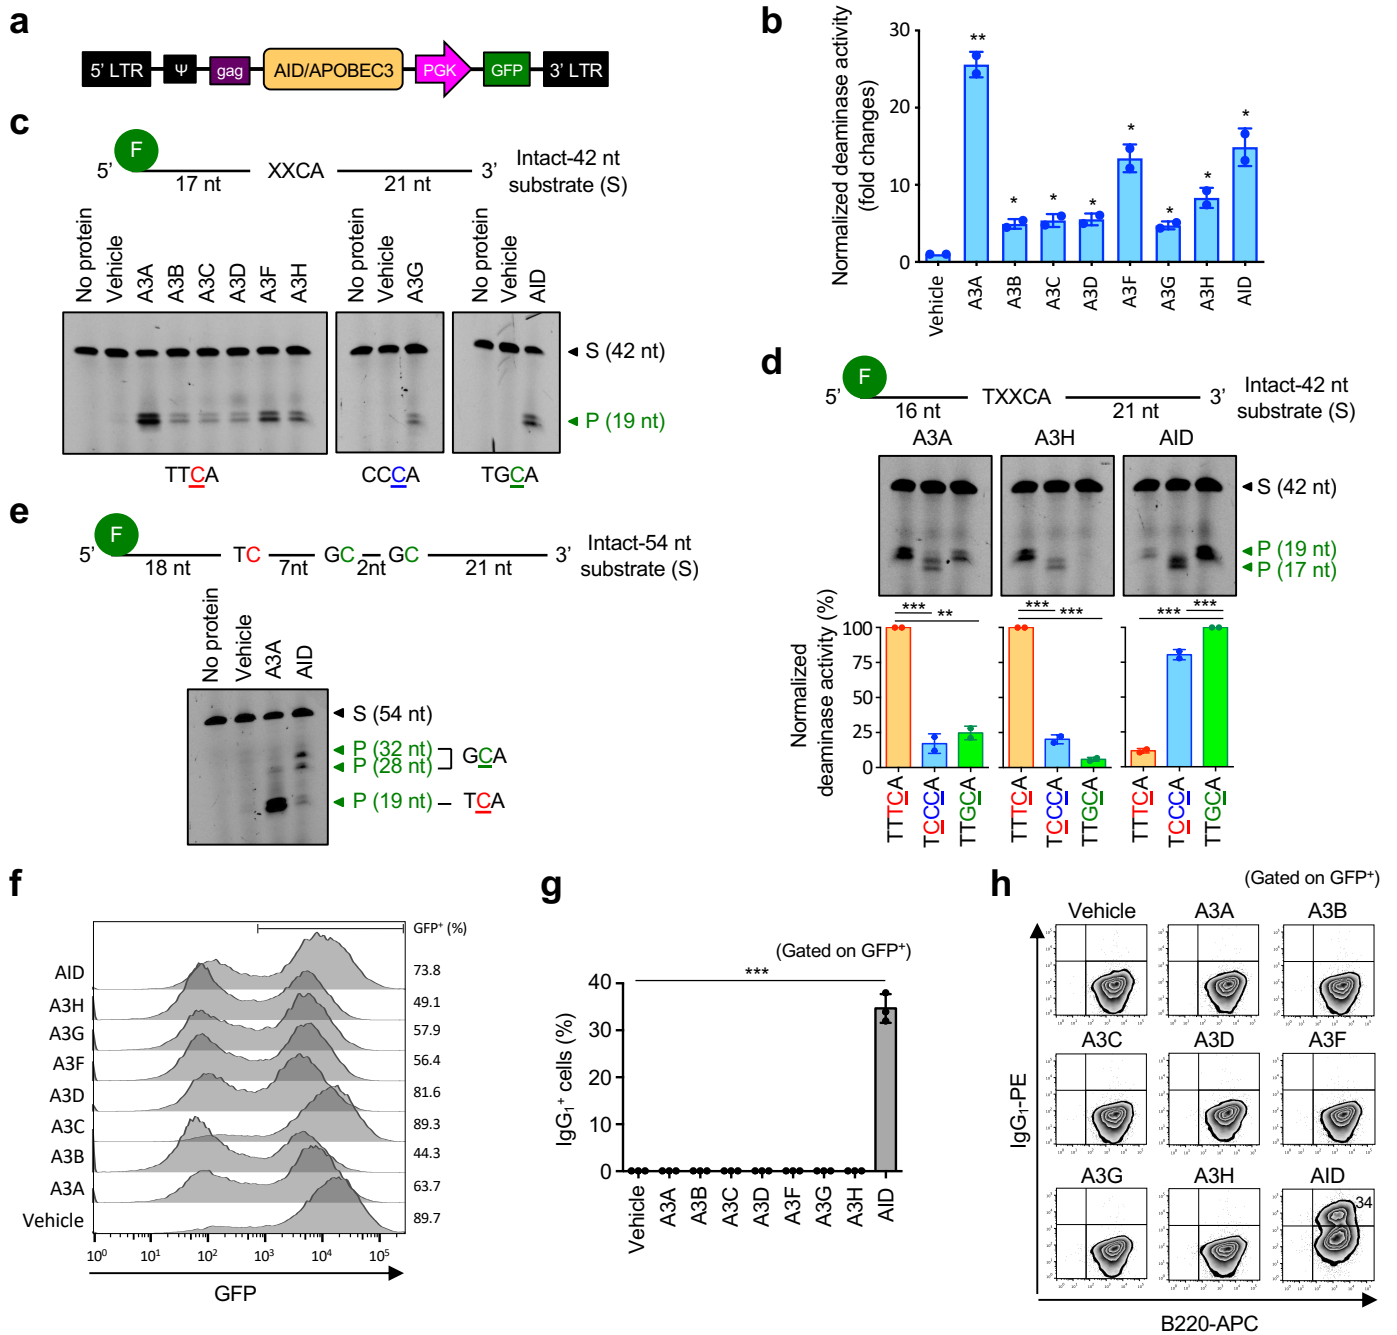

# Extended Data Figure 3

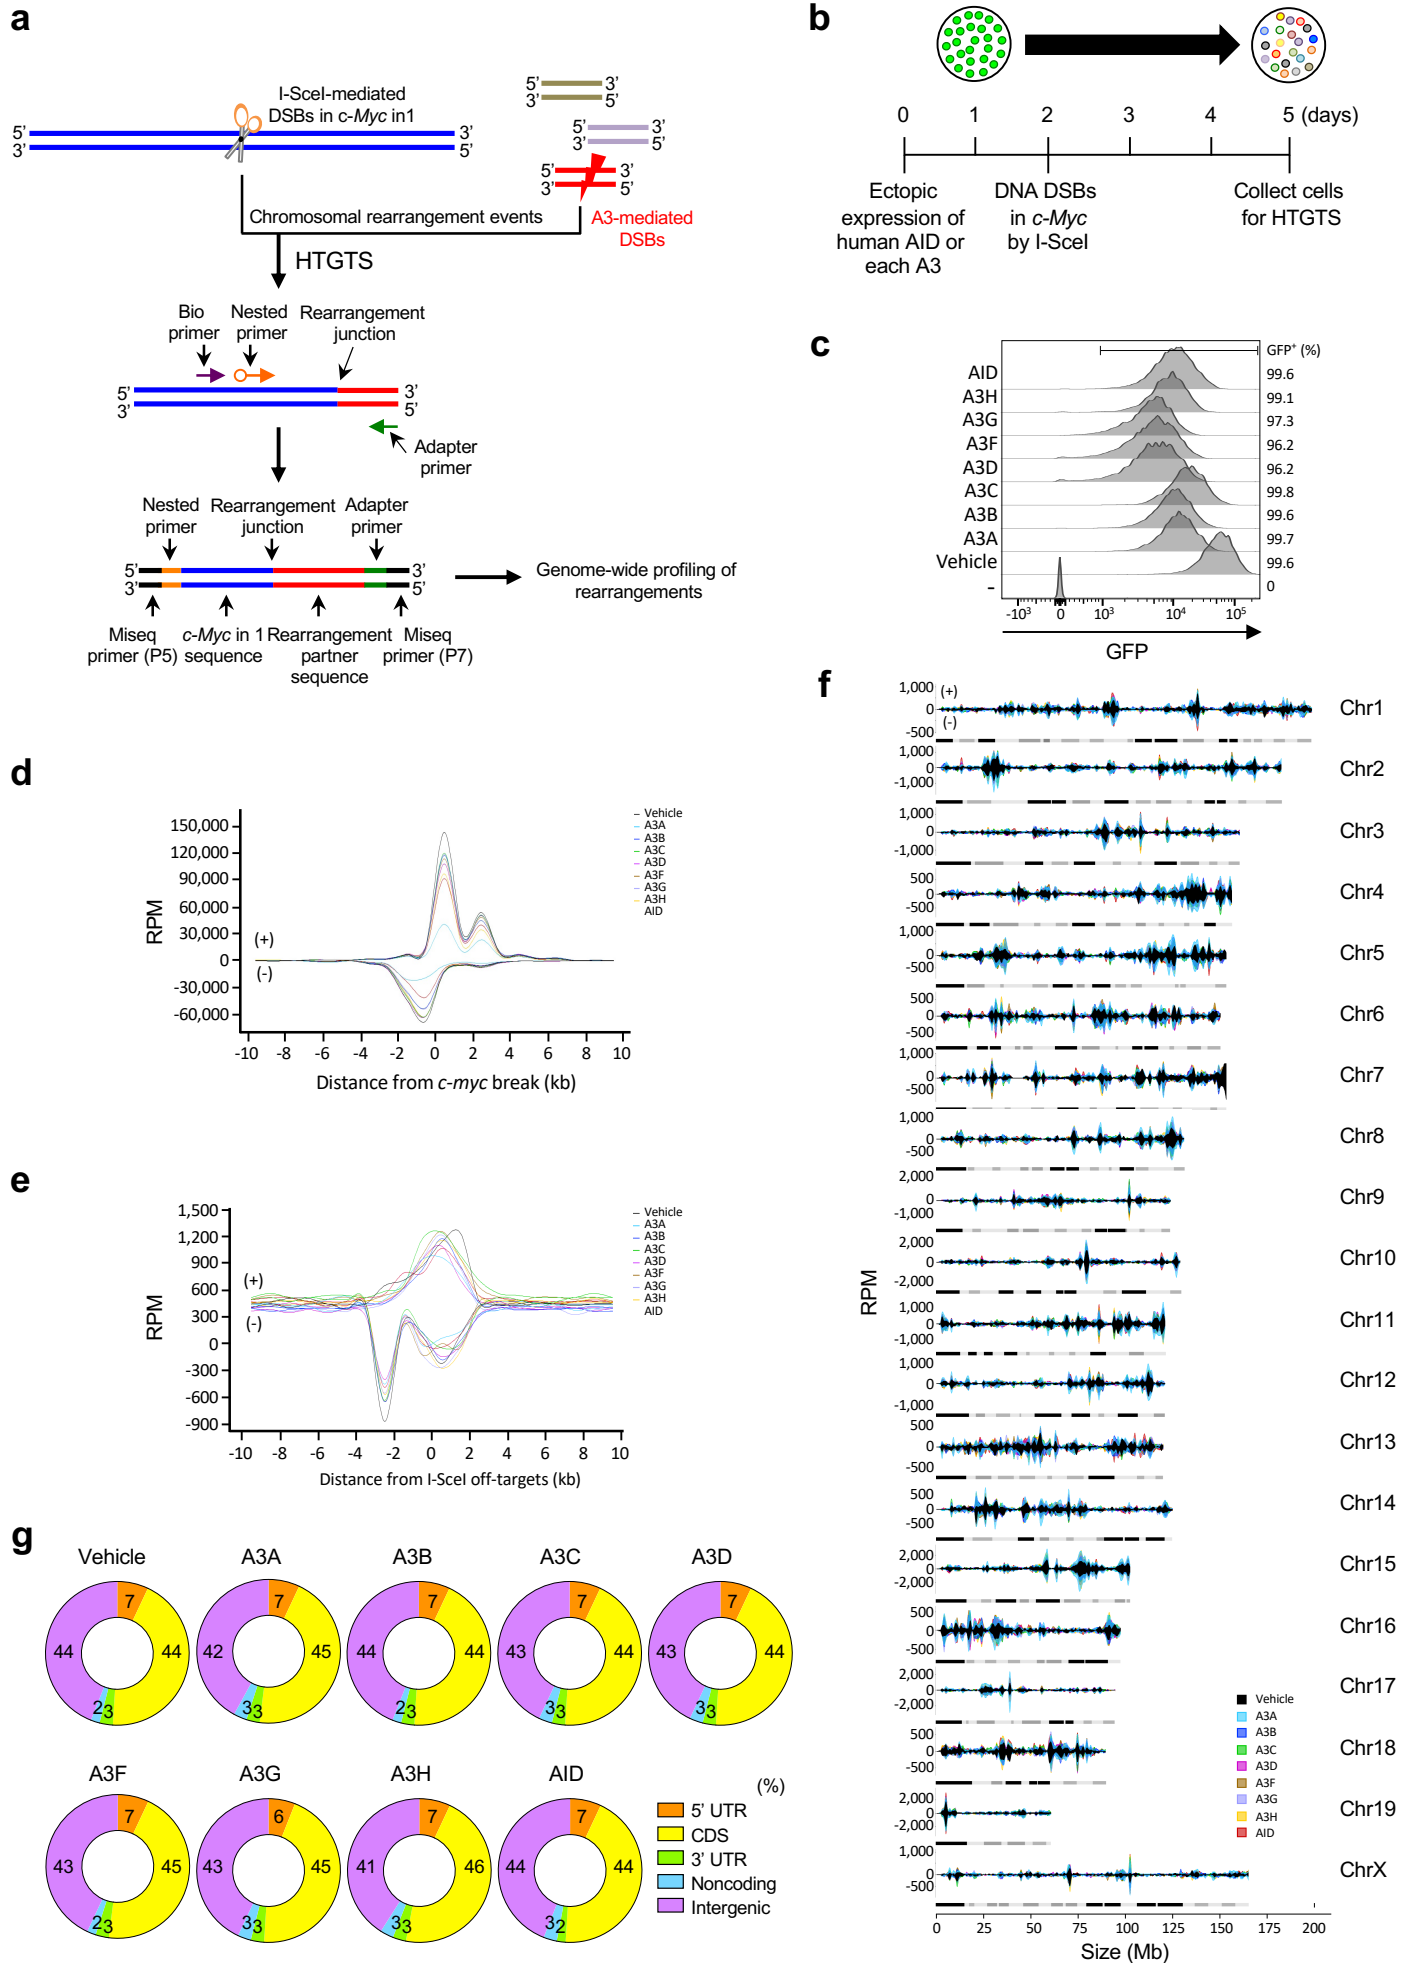

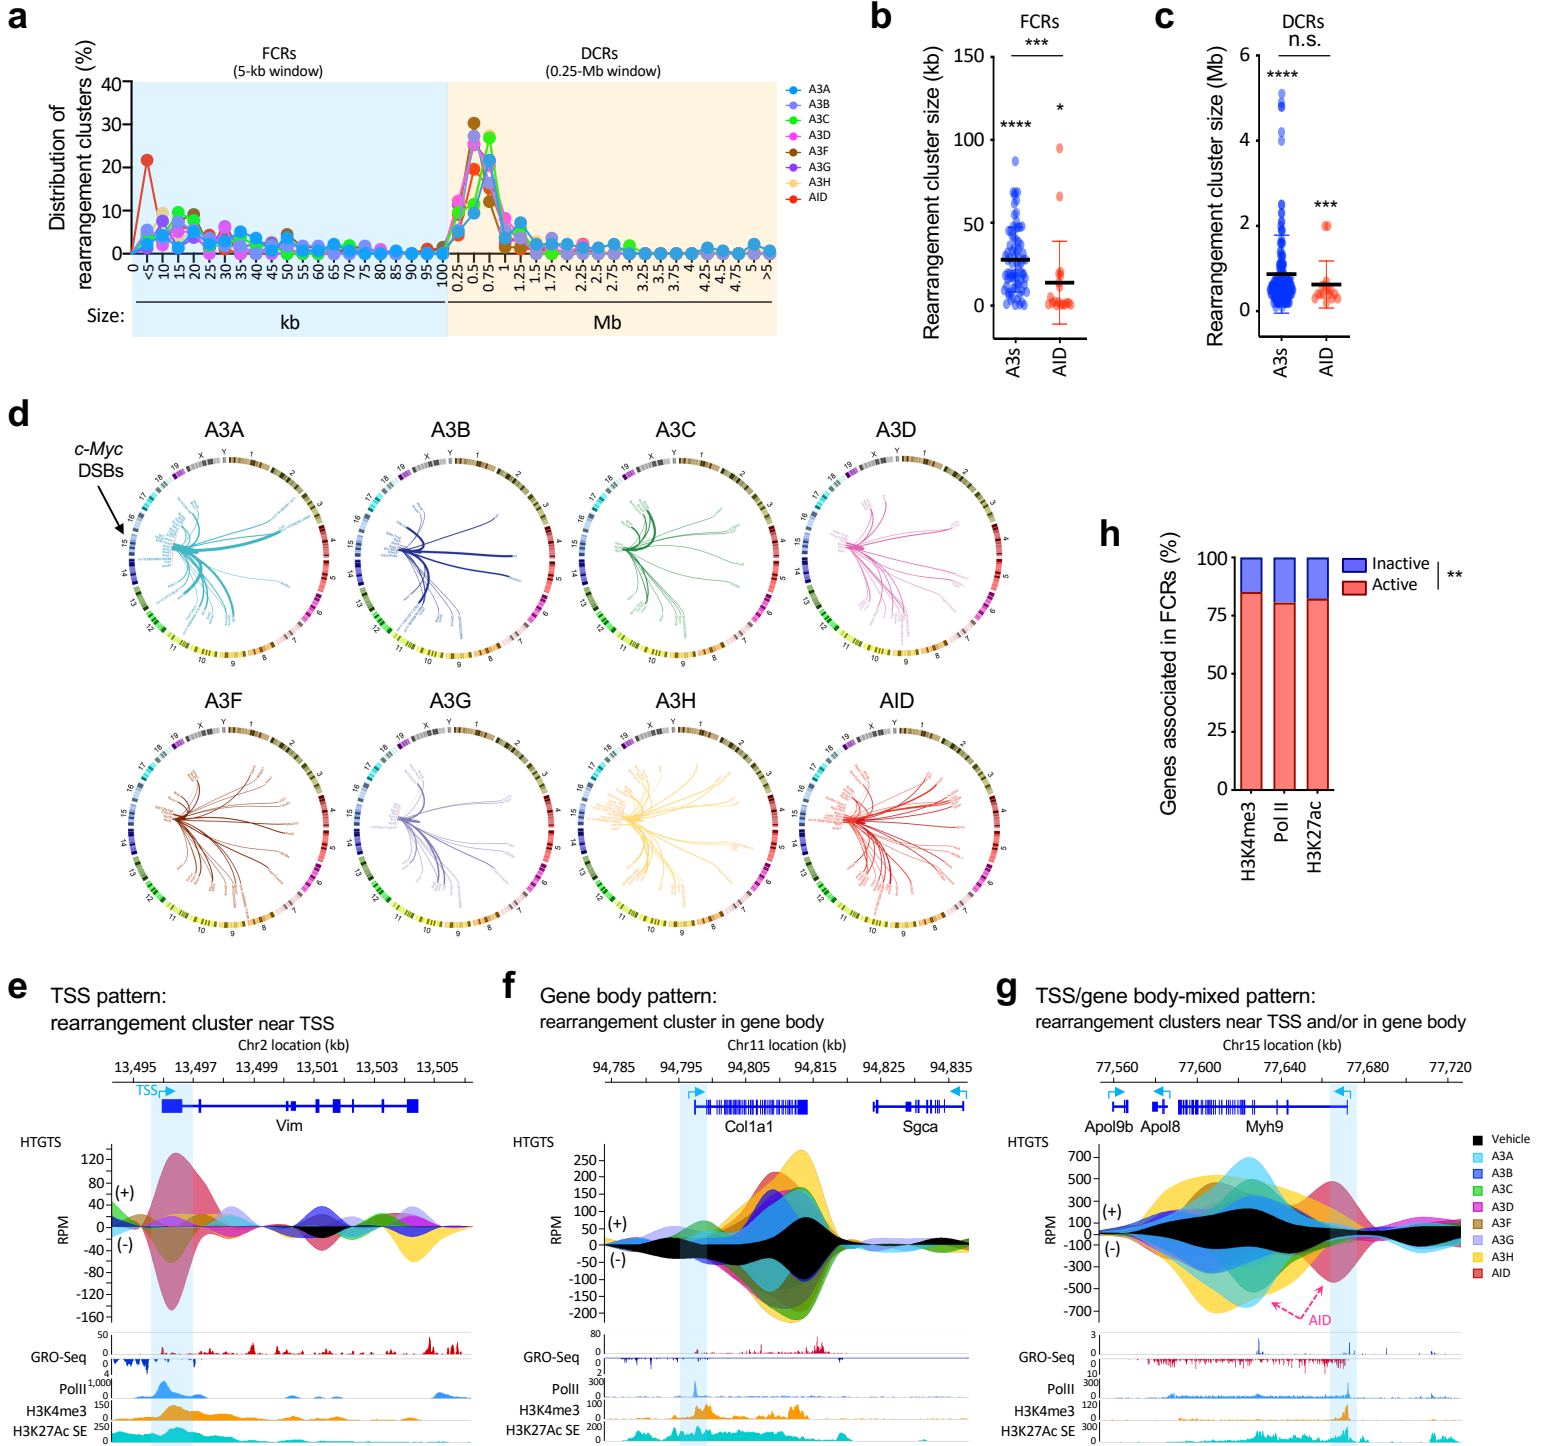



# Extended Data Figure 6

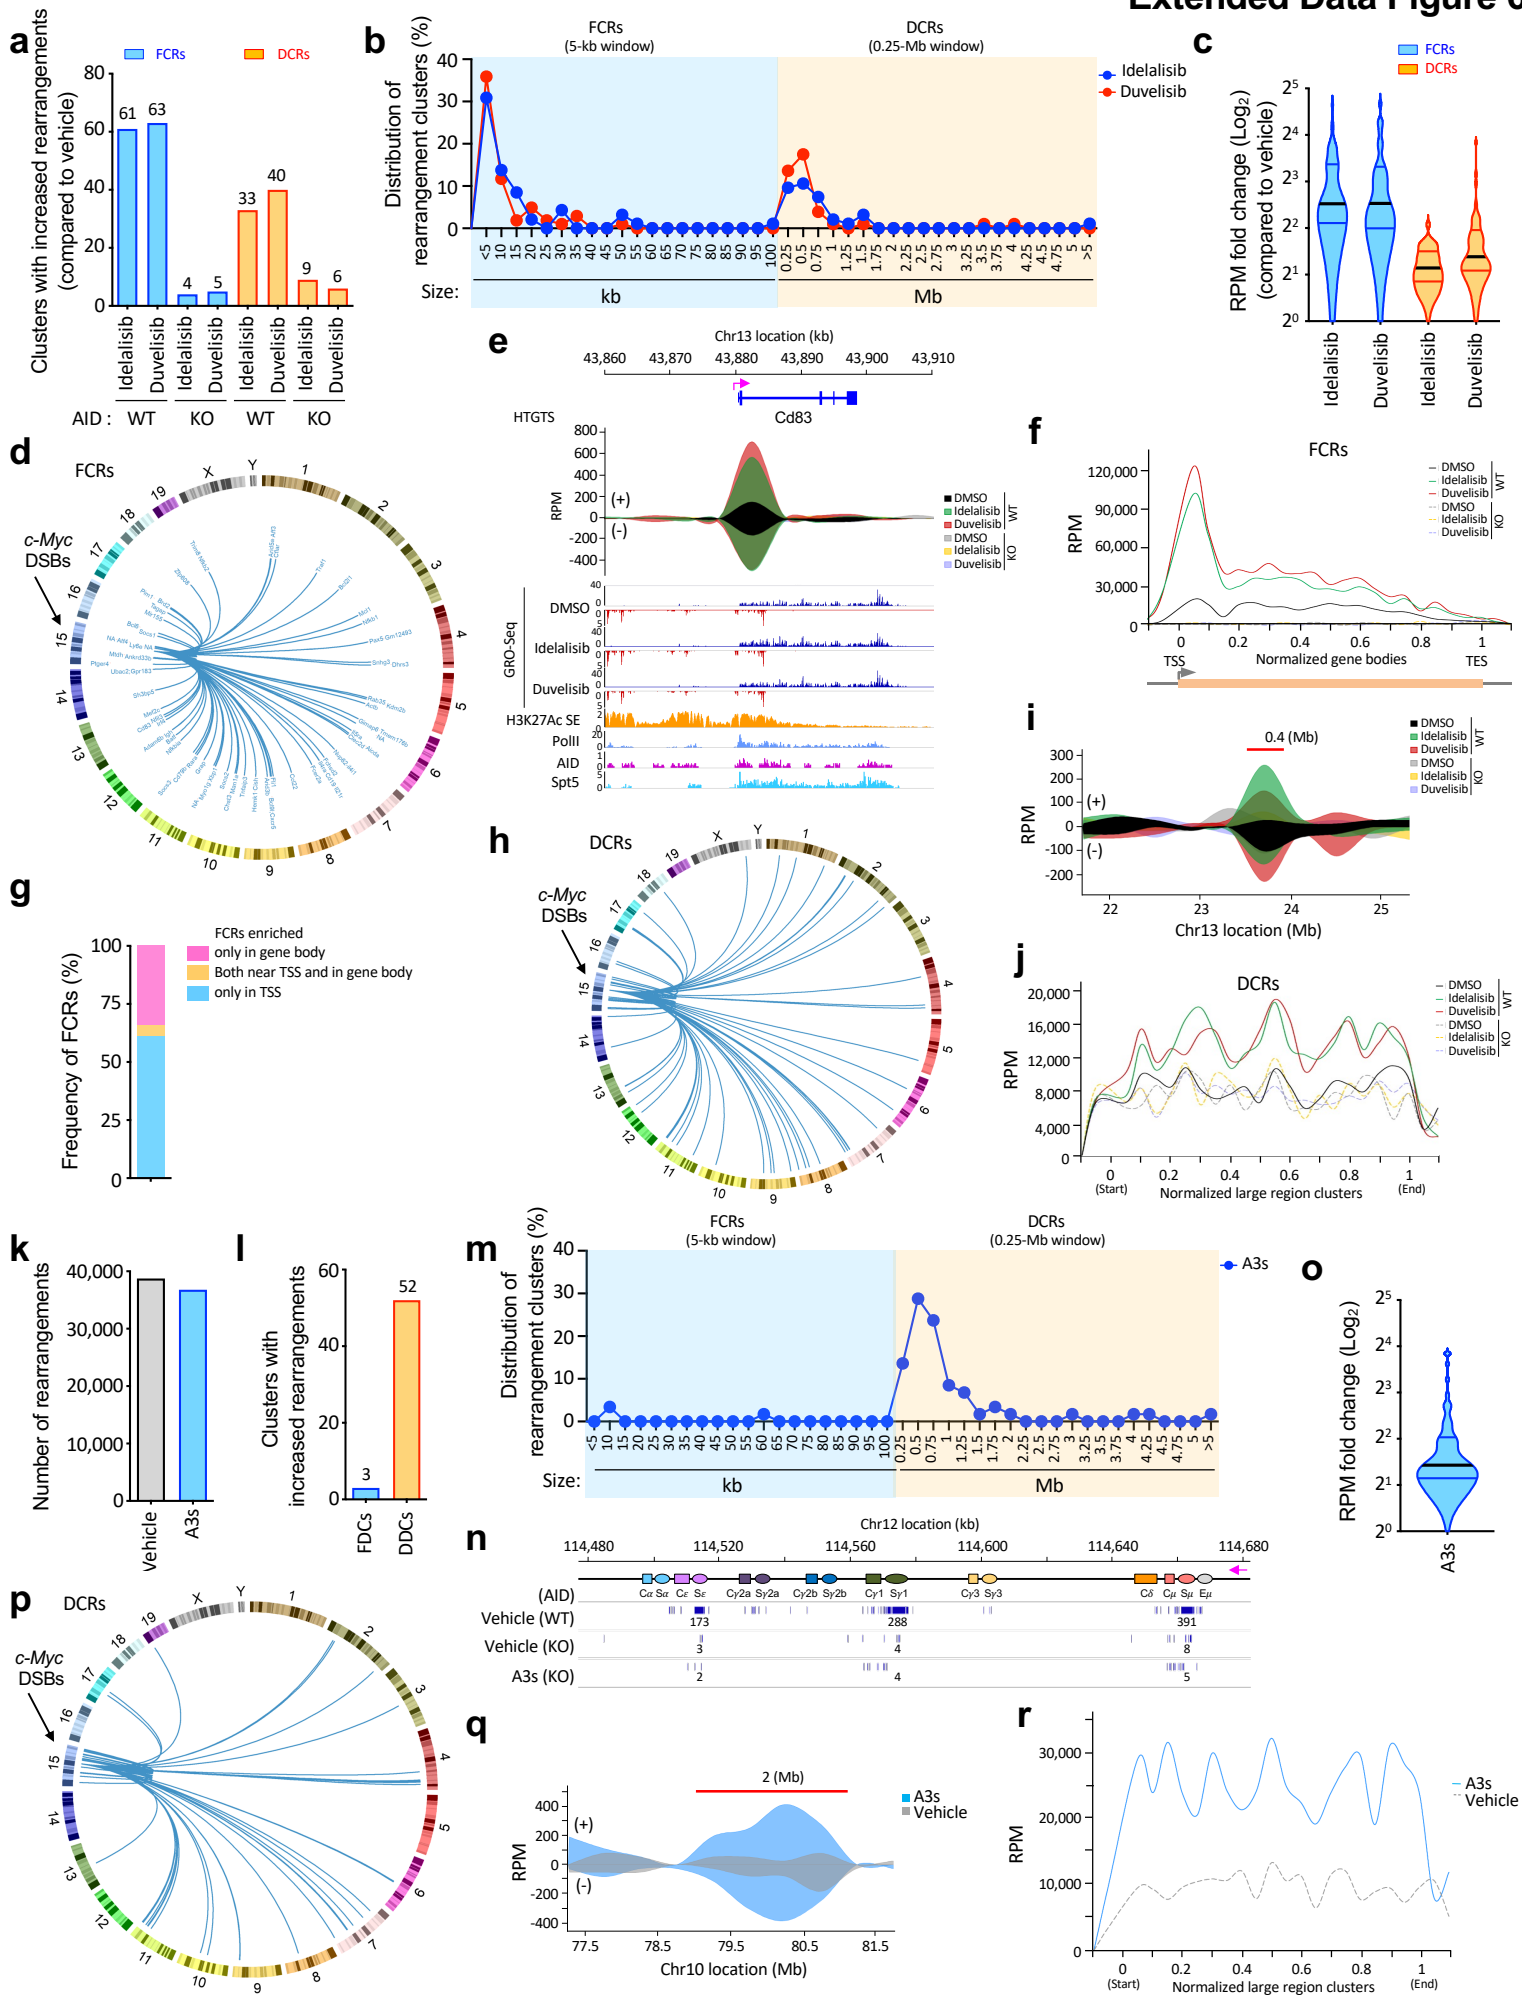

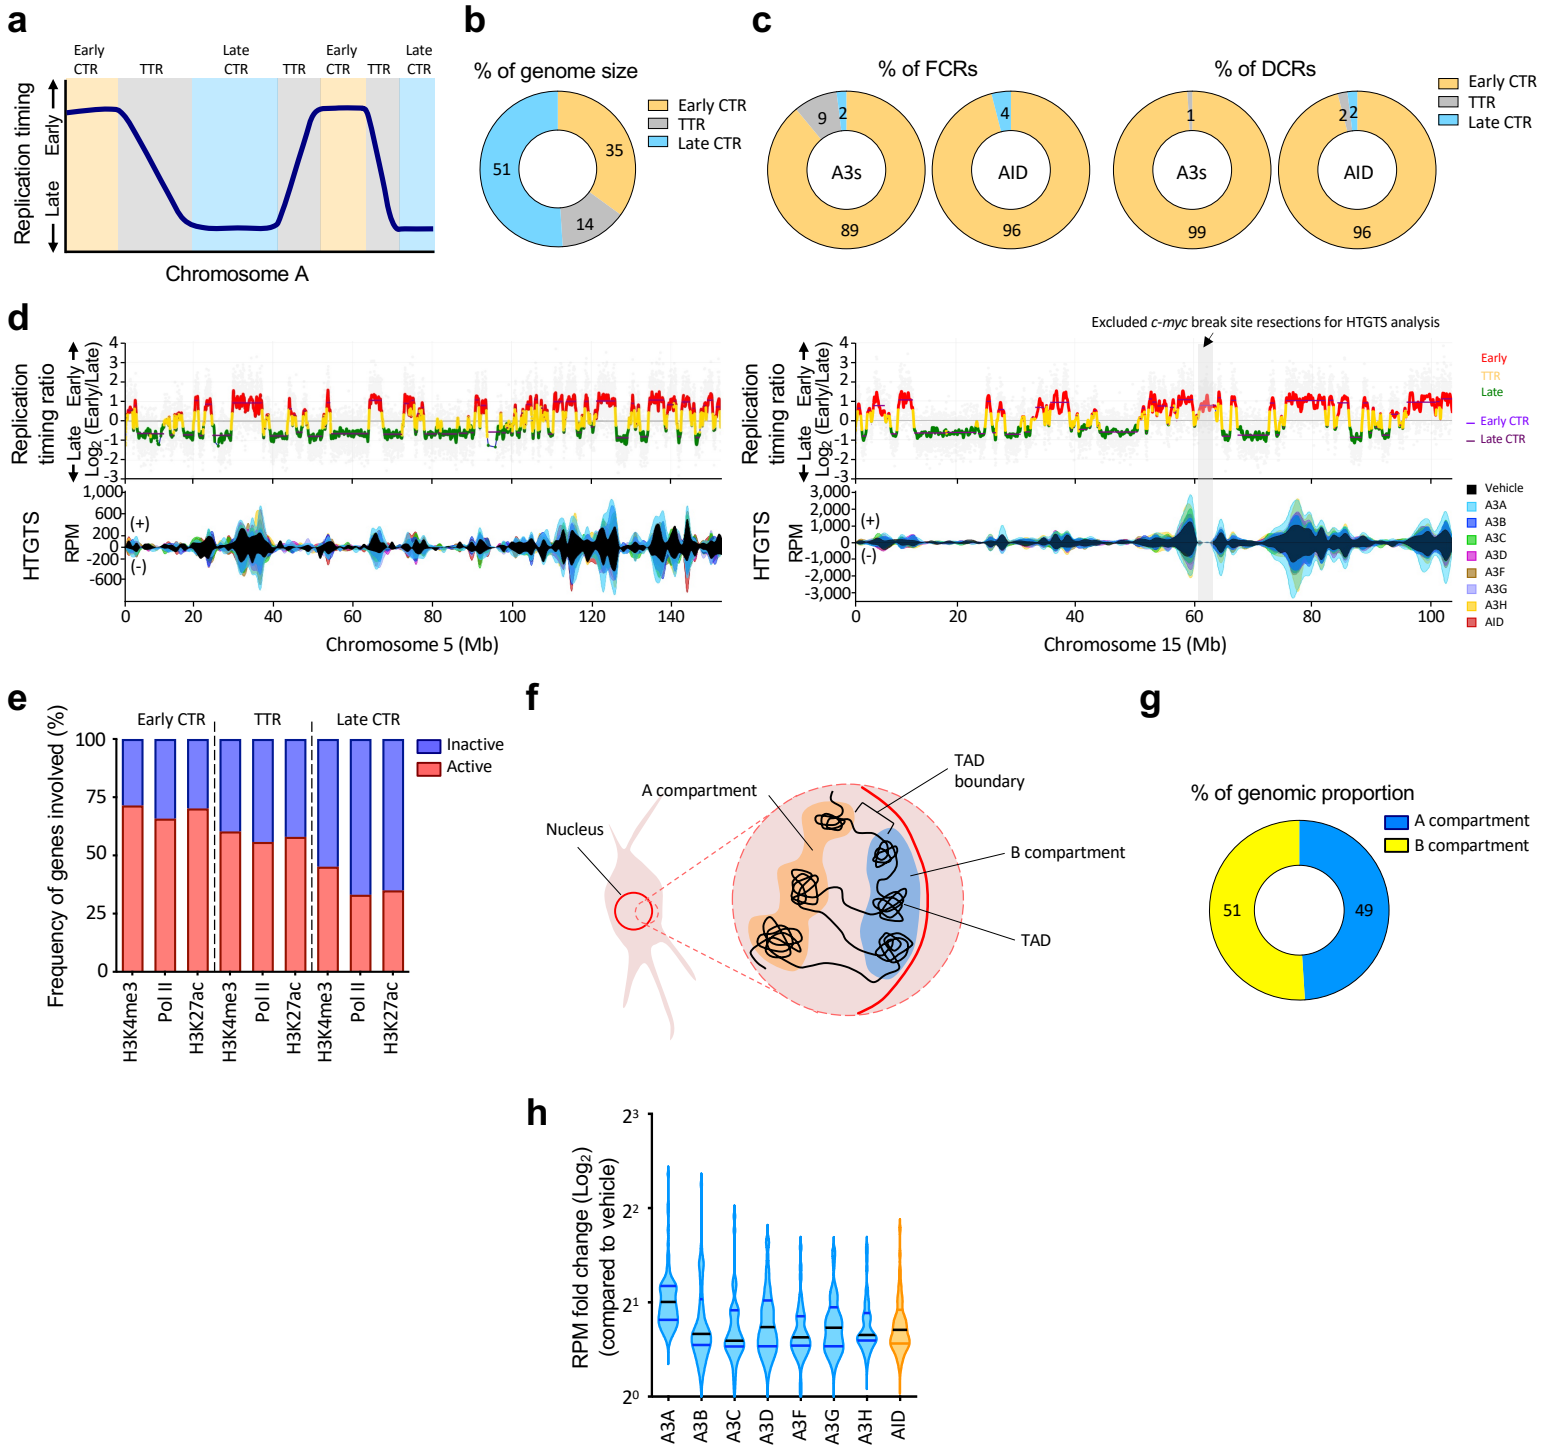

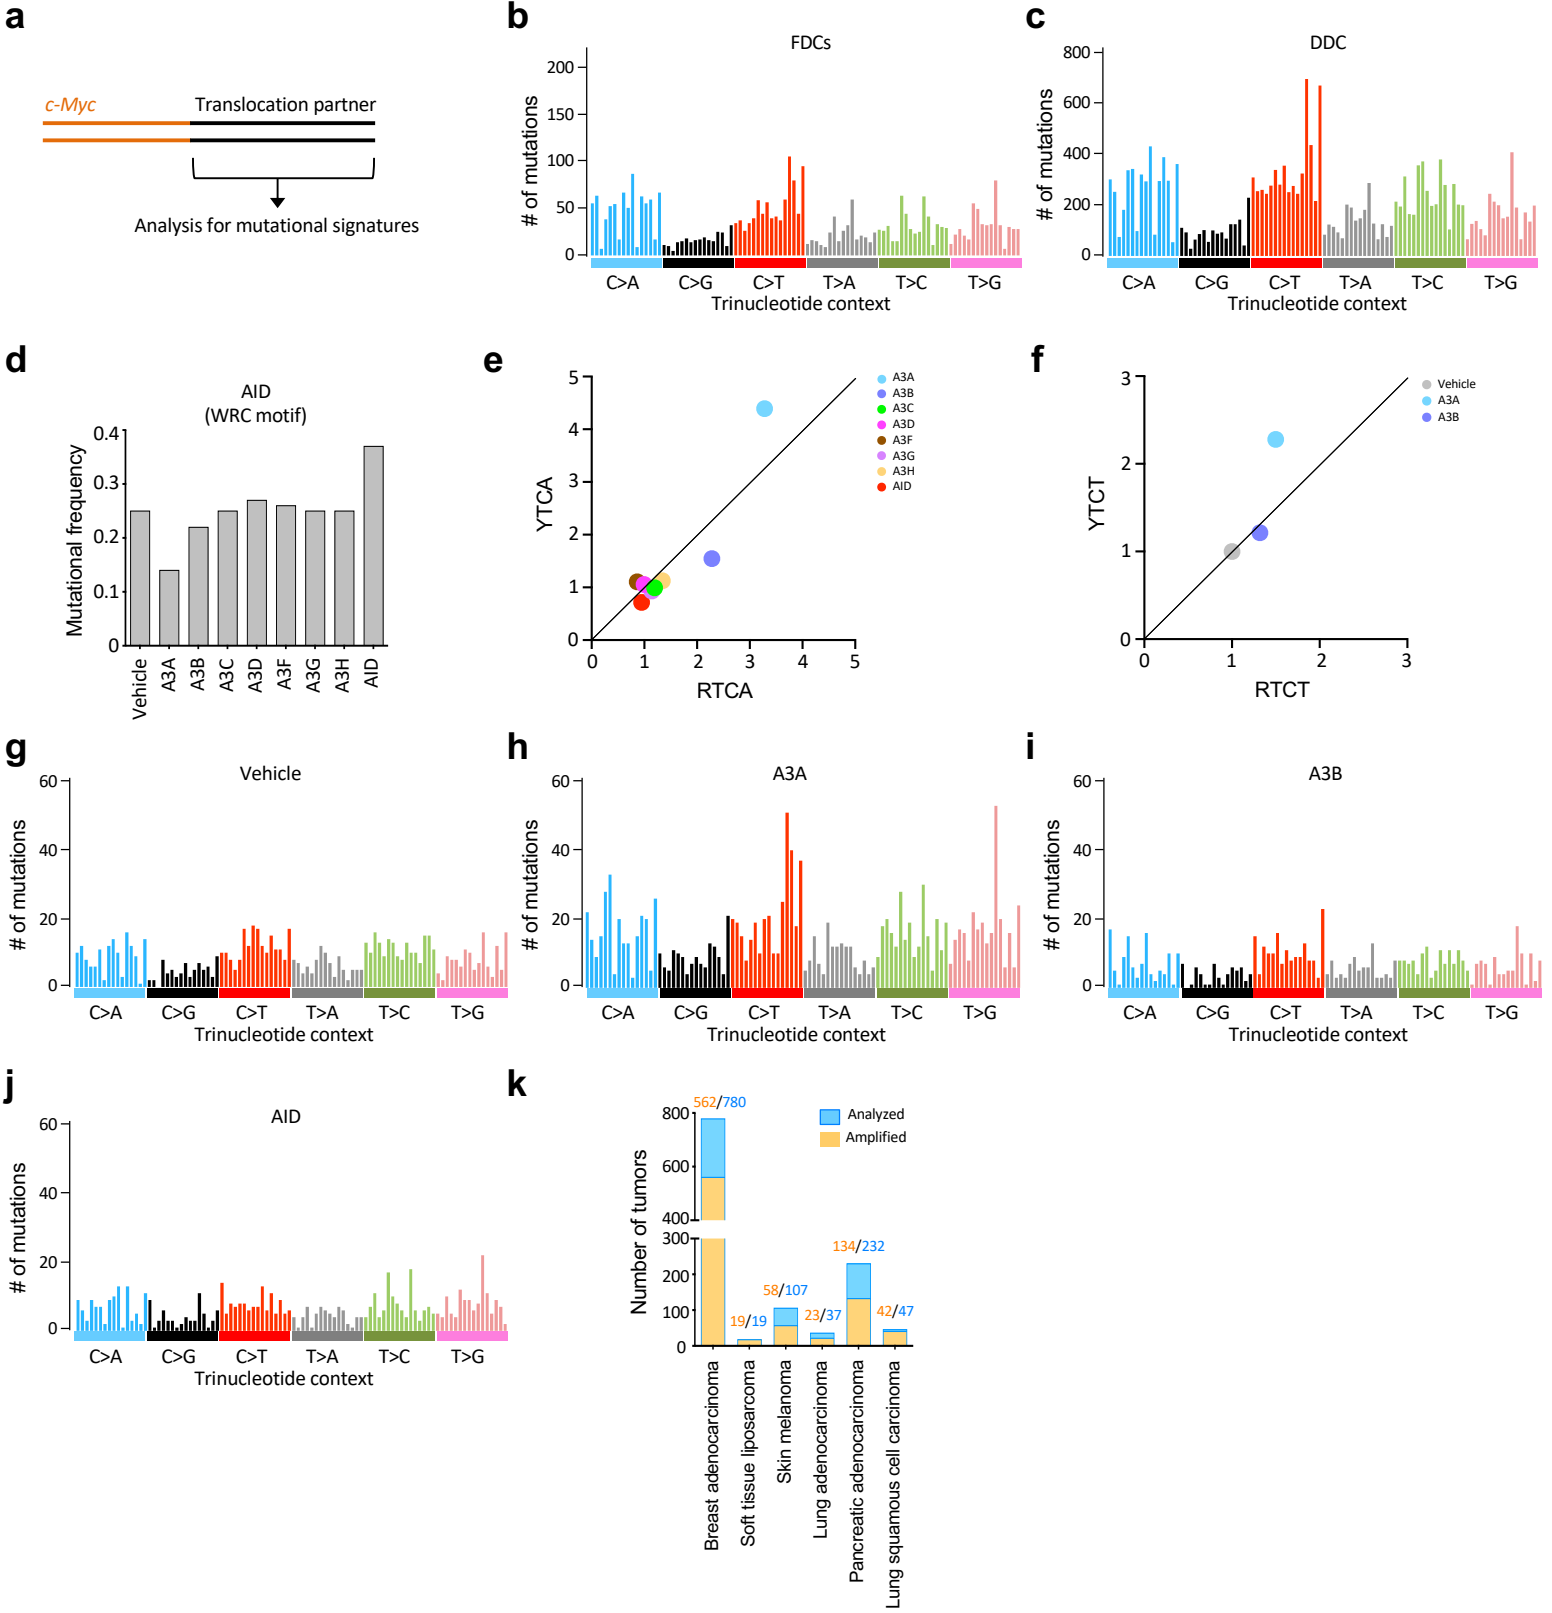

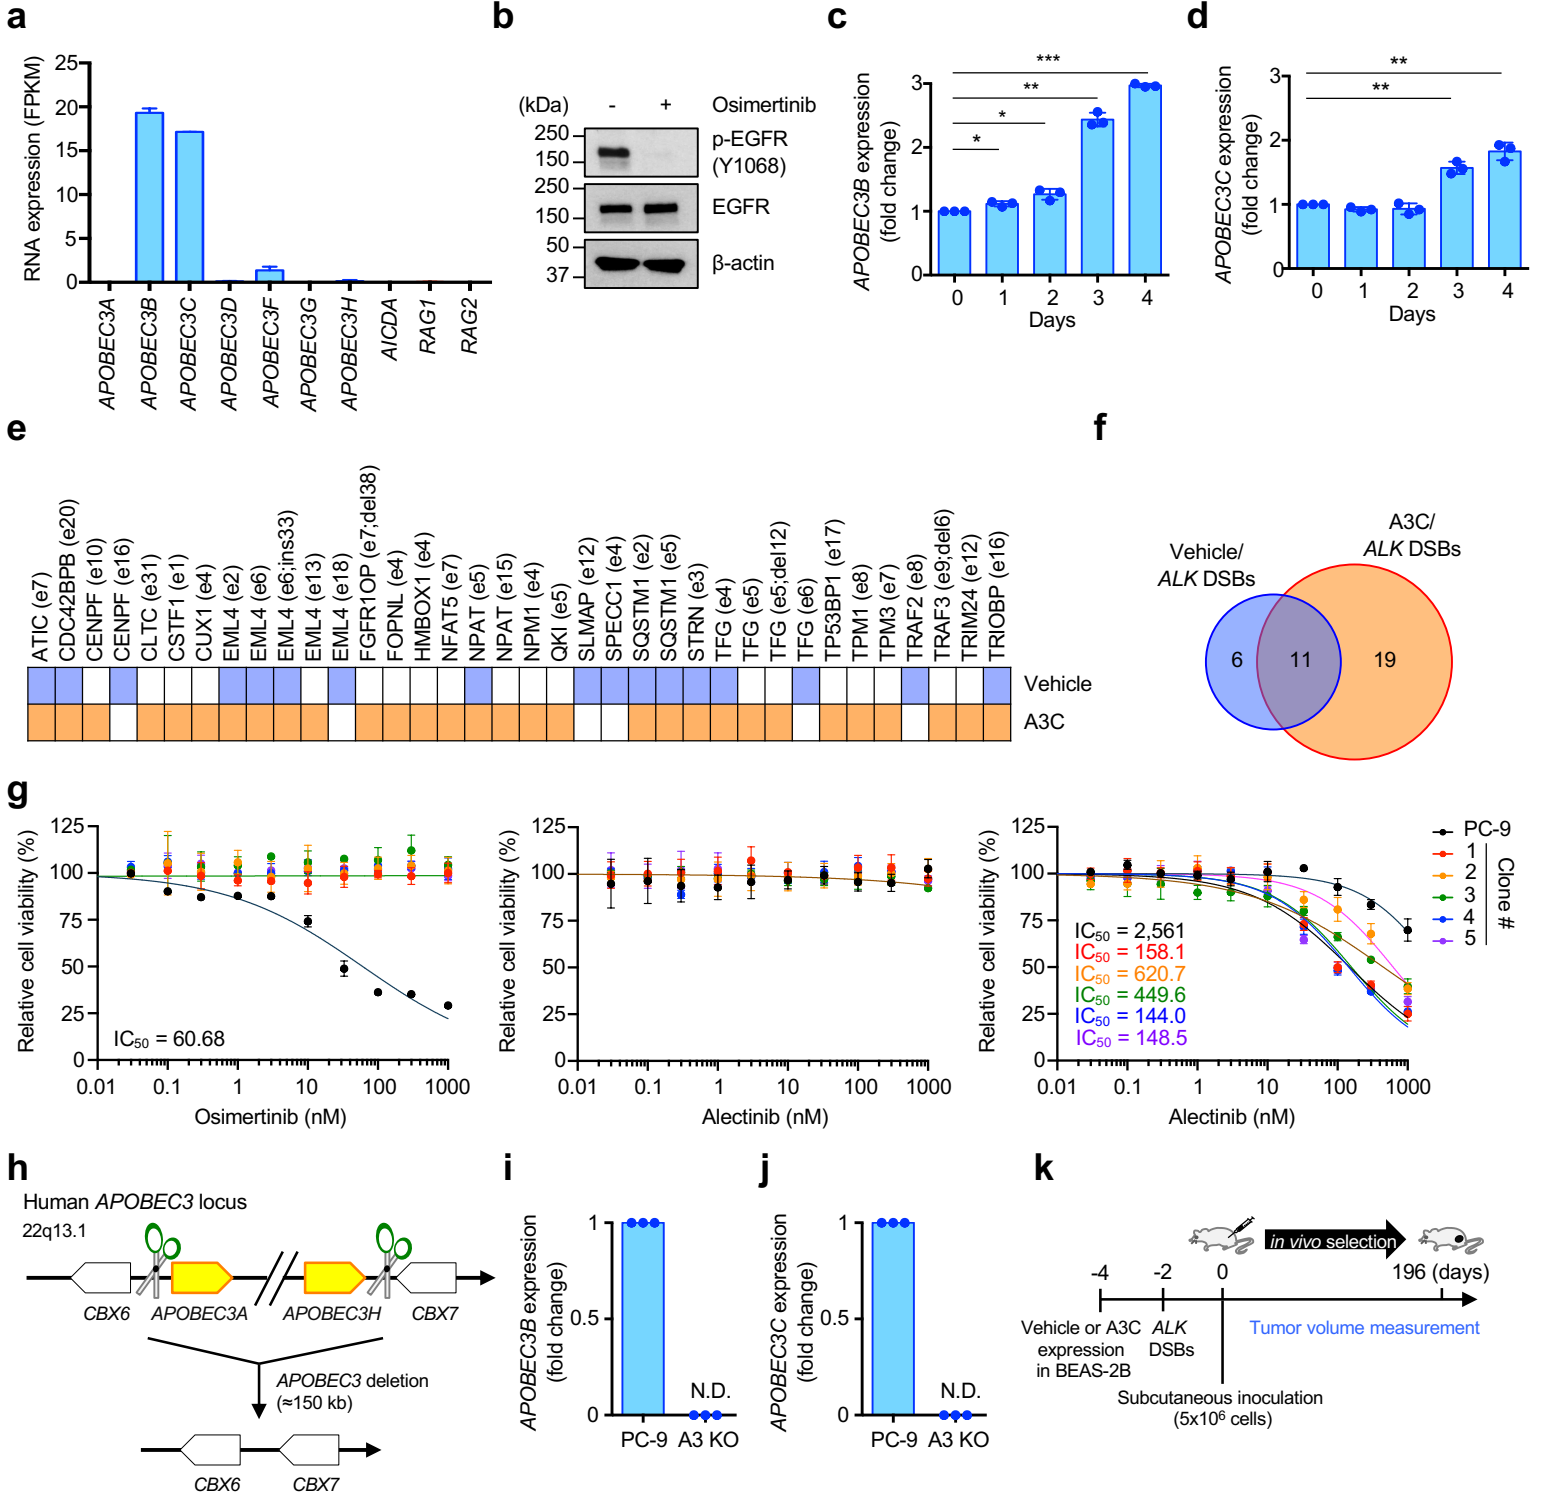

Supplement: Supplementary file 1 [file 1818ace34e94db4fad67adcb.pdf]
